# Supplementary material for: Changing the reaction pathway of the CaAl2 oxidation using ball milling
Source: Royal Society of Chemistry journal article supplement (doi:10.1039/d4dt02459a), 2024-11-13
Supplement: d4dt02459a1.pdf [file d4dt02459a1.pdf]

# SUPPORTING INFORMATION

## Changing the reaction pathway of the $\text{CaAl}_2$ oxidation using ball milling

**Elias C. J. Gießelmann, Guido Kickelbick, Oliver Janka\***

**Elias C. J. Gießelmann, Guido Kickelbick**, Inorganic Solid State Chemistry, Saarland University, Campus C4.1, 66123 Saarbrücken, Germany

\* **Corresponding authors: Oliver Janka**, Inorganic Solid State Chemistry, Saarland University des Saarlandes, Campus C4.1, 66123 Saarbrücken, Germany, e-mail: [oliver.janka@uni-saarland.de](mailto:oliver.janka@uni-saarland.de)

**Keywords:** intermetallics, ball milling, oxidation, thermal analysis, NMR spectroscopy, quantum-chemical calculations

## Powder X-ray diffraction

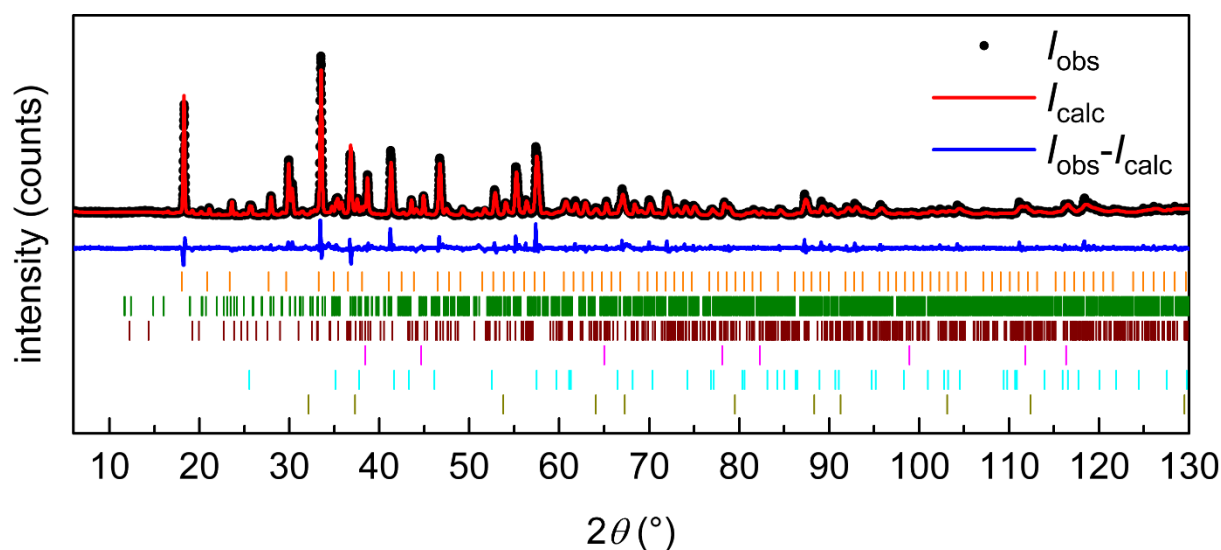

**Figure S1.** Powder X-ray diffraction pattern of  $\text{CaAl}_2$  oxidized with wet argon. Black circles represent the collected data, the red line is the fit, the blue line the difference curve and the ticks represent the Bragg positions of the refined phases. The following color code applies: orange –  $\text{Ca}_{12}\text{Al}_{14}\text{O}_{33}$  ( $\bar{I}43d$ ); green –  $\text{CaAl}_2\text{O}_4$  ( $P2_1/c$ ); dark red –  $\text{CaAl}_4\text{O}_7$  ( $C2/c$ ); pink –  $\text{Al}$  ( $Fm\bar{3}m$ ); cyan –  $\text{Al}_2\text{O}_3$  ( $R\bar{3}c$ ); olive –  $\text{CaO}$  ( $Fm\bar{3}m$ ).

| Refinement details for the data shown in Figure S1 |                                                                                                                                              |
|----------------------------------------------------|----------------------------------------------------------------------------------------------------------------------------------------------|
| Source                                             | Bruker D8 ADVANCE (laboratory X-ray)                                                                                                         |
| Temperature                                        | RT                                                                                                                                           |
| Pressure                                           | ambient                                                                                                                                      |
| Wavelengths                                        | $\text{Cu } K\alpha_1$ and $\text{Cu } K\alpha_2$ : 154.0596 and 154.4308 pm                                                                 |
| $d$ -space range                                   | 0.85-14.35 Å (6-130° $2\theta$ )                                                                                                             |
| $\chi^2$                                           | 6.36                                                                                                                                         |
| $R_p$ / %                                          | 8.13                                                                                                                                         |
| $R_{wp}$ / %                                       | 10.64                                                                                                                                        |
| Definition of $R$ factors                          | $R_p = \frac{\sum  w   I_0 - I_c ^2}{\sum  w  I_0^2};$ $R_{wp} = \left( \frac{\sum  w   I_0 - I_c ^2}{\sum  w  I_0^2} \right)^{\frac{1}{2}}$ |

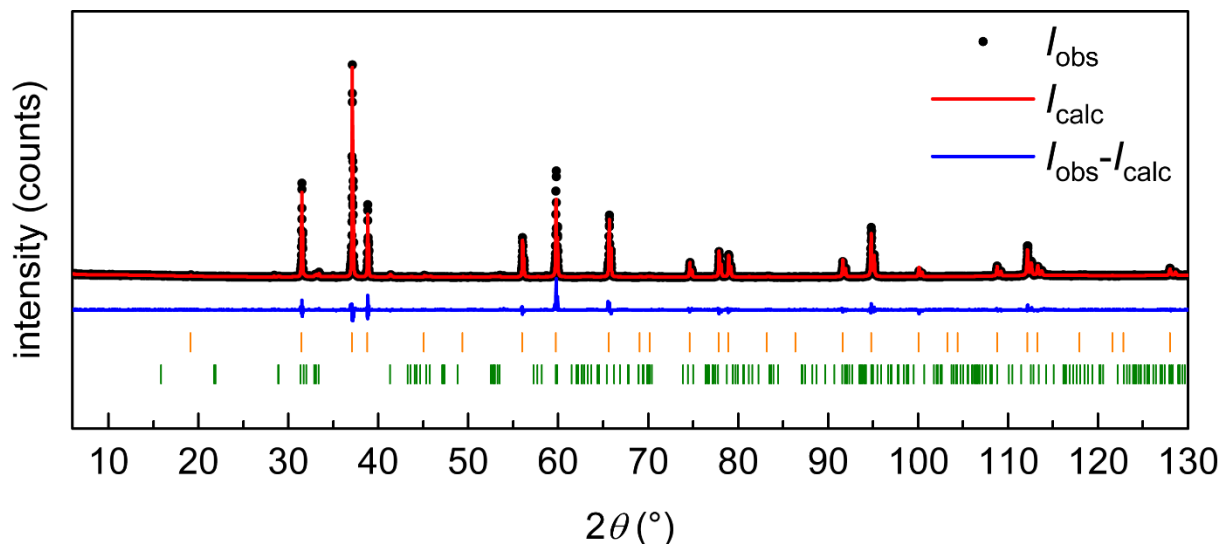

**Figure S2.** Powder X-ray diffraction pattern of as synthesized  $\text{CaAl}_2$ . Black circles represent the collected data, the red line is the fit, the blue line the difference curve and the ticks represent the Bragg positions of the refined phases. The following color code applies: orange –  $\text{CaAl}_2$  ( $Fd\bar{3}m$ ); green –  $\text{CaAl}_4$  ( $C2/m$ ).

| Refinement details for the data shown in Figure S2 |                                                                                                                                              |
|----------------------------------------------------|----------------------------------------------------------------------------------------------------------------------------------------------|
| Source                                             | Bruker D8 ADVANCE (laboratory X-ray)                                                                                                         |
| Temperature                                        | RT                                                                                                                                           |
| Pressure                                           | ambient                                                                                                                                      |
| Wavelengths                                        | $\text{Cu } K\alpha_1$ and $\text{Cu } K\alpha_2$ : 154.0596 and 154.4308 pm                                                                 |
| $d$ -space range                                   | 0.85-14.35 Å (6-130° $2\theta$ )                                                                                                             |
| $\chi^2$                                           | 4.11                                                                                                                                         |
| $R_p$ / %                                          | 7.10                                                                                                                                         |
| $R_{wp}$ / %                                       | 10.04                                                                                                                                        |
| Definition of $R$ factors                          | $R_p = \frac{\sum  w   I_0 - I_c ^2}{\sum  w  I_0^2};$ $R_{wp} = \left( \frac{\sum  w   I_0 - I_c ^2}{\sum  w  I_0^2} \right)^{\frac{1}{2}}$ |

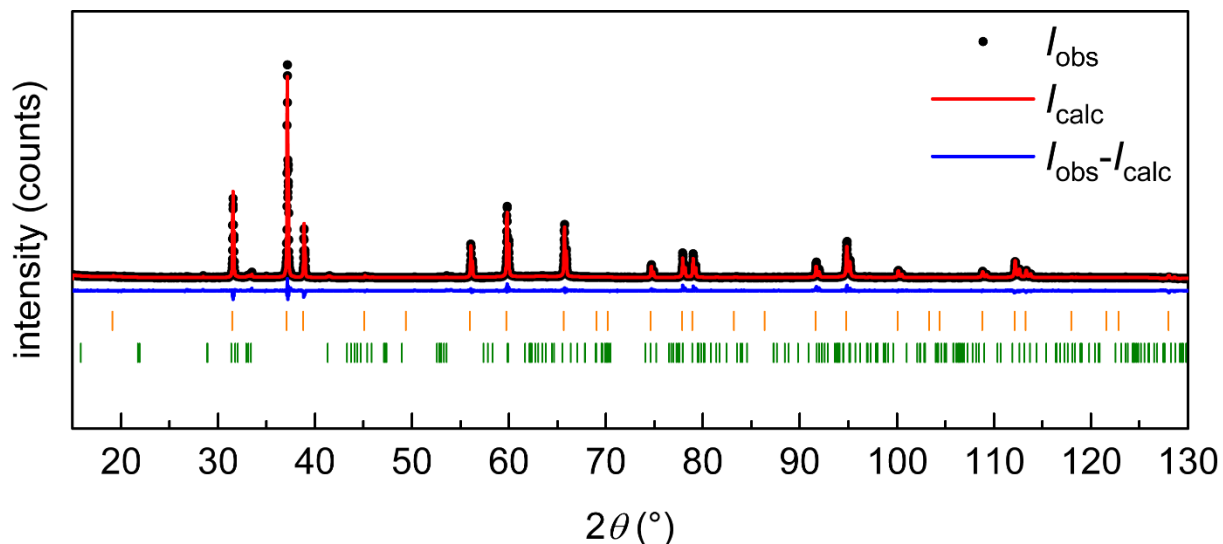

**Figure S3.** Powder X-ray diffraction pattern of CaAl<sub>2</sub> ball milled for 5 min. Black circles represent the collected data, the red line is the fit, the blue line the difference curve and the ticks represent the Bragg positions of the refined phases. The following color code applies: orange – CaAl<sub>2</sub> (*Fd* $\bar{3}$ *m*); green – CaAl<sub>4</sub> (*C2/m*).

| Refinement details for the data shown in Figure S3 |                                                                                                                                              |
|----------------------------------------------------|----------------------------------------------------------------------------------------------------------------------------------------------|
| Source                                             | Bruker D8 ADVANCE (laboratory X-ray)                                                                                                         |
| Temperature                                        | RT                                                                                                                                           |
| Pressure                                           | ambient                                                                                                                                      |
| Wavelengths                                        | Cu <i>K</i> $\alpha$ <sub>1</sub> and Cu <i>K</i> $\alpha$ <sub>2</sub> : 154.0596 and 154.4308 pm                                           |
| <i>d</i> -space range                              | 0.85-14.35 Å (6-130° 2 $\theta$ )                                                                                                            |
| $\chi^2$                                           | 2.41                                                                                                                                         |
| <i>R</i> <sub>p</sub> / %                          | 8.11                                                                                                                                         |
| <i>R</i> <sub>wp</sub> / %                         | 10.77                                                                                                                                        |
| Definition of <i>R</i> factors                     | $R_p = \frac{\sum  w   I_0 - I_c ^2}{\sum  w  I_0^2};$ $R_{wp} = \left( \frac{\sum  w   I_0 - I_c ^2}{\sum  w  I_0^2} \right)^{\frac{1}{2}}$ |

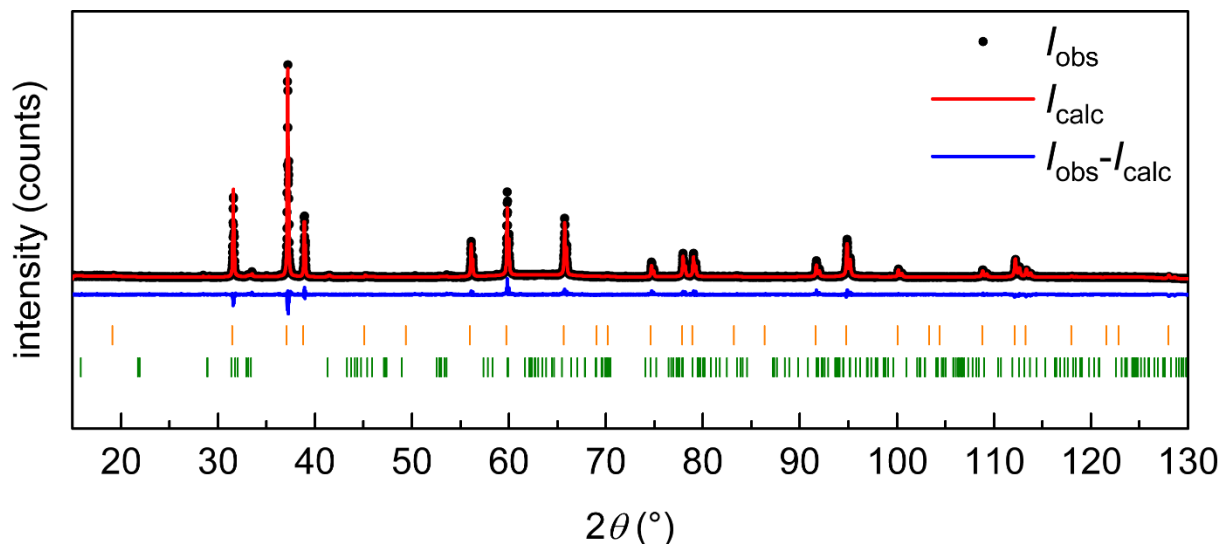

**Figure S4.** Powder X-ray diffraction pattern of  $\text{CaAl}_2$  ball milled for 10 min. Black circles represent the collected data, the red line is the fit, the blue line the difference curve and the ticks represent the Bragg positions of the refined phases. The following color code applies: orange –  $\text{CaAl}_2$  ( $Fd\bar{3}m$ ); green –  $\text{CaAl}_4$  ( $C2/m$ ).

| Refinement details for the data shown in Figure S4 |                                                                                                                                              |
|----------------------------------------------------|----------------------------------------------------------------------------------------------------------------------------------------------|
| Source                                             | Bruker D8 ADVANCE (laboratory X-ray)                                                                                                         |
| Temperature                                        | RT                                                                                                                                           |
| Pressure                                           | ambient                                                                                                                                      |
| Wavelengths                                        | $\text{Cu } K\alpha_1$ and $\text{Cu } K\alpha_2$ : 154.0596 and 154.4308 pm                                                                 |
| $d$ -space range                                   | 0.85-14.35 Å (6-130° $2\theta$ )                                                                                                             |
| $\chi^2$                                           | 2.23                                                                                                                                         |
| $R_p$ / %                                          | 8.81                                                                                                                                         |
| $R_{wp}$ / %                                       | 11.37                                                                                                                                        |
| Definition of $R$ factors                          | $R_p = \frac{\sum  w   I_0 - I_c ^2}{\sum  w  I_0^2};$ $R_{wp} = \left( \frac{\sum  w   I_0 - I_c ^2}{\sum  w  I_0^2} \right)^{\frac{1}{2}}$ |

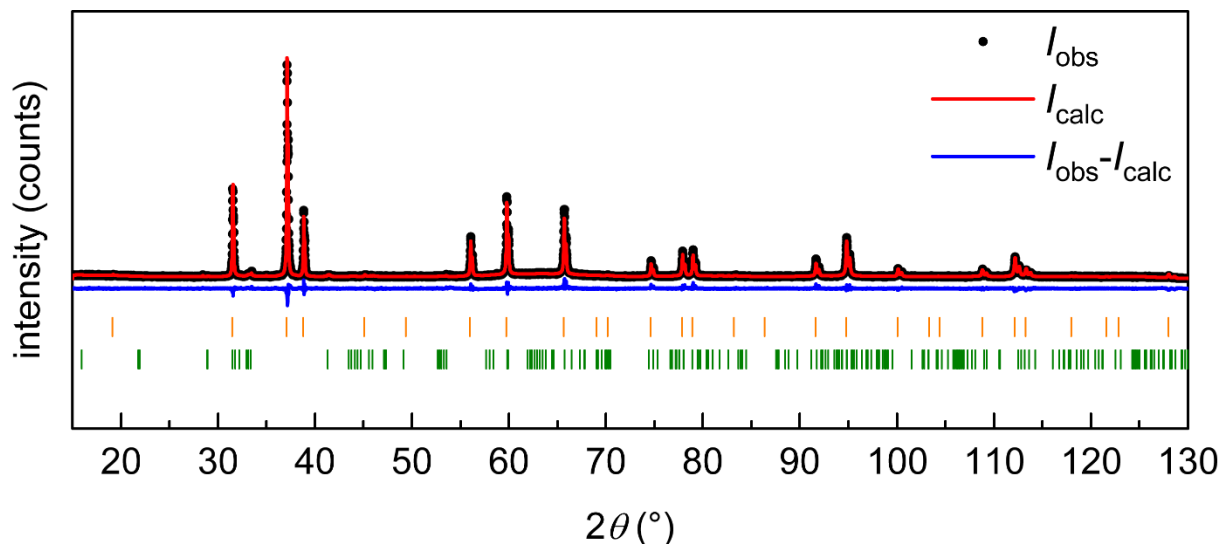

**Figure S5.** Powder X-ray diffraction pattern of CaAl<sub>2</sub> ball milled for 15 min. Black circles represent the collected data, the red line is the fit, the blue line the difference curve and the ticks represent the Bragg positions of the refined phases. The following color code applies: orange – CaAl<sub>2</sub> (*Fd* $\bar{3}$ *m*); green – CaAl<sub>4</sub> (*C2/m*).

| Refinement details for the data shown in Figure S5 |                                                                                                                                              |
|----------------------------------------------------|----------------------------------------------------------------------------------------------------------------------------------------------|
| Source                                             | Bruker D8 ADVANCE (laboratory X-ray)                                                                                                         |
| Temperature                                        | RT                                                                                                                                           |
| Pressure                                           | ambient                                                                                                                                      |
| Wavelengths                                        | Cu <i>K</i> $\alpha_1$ and Cu <i>K</i> $\alpha_2$ : 154.0596 and 154.4308 pm                                                                 |
| <i>d</i> -space range                              | 0.85-14.35 Å (6-130° 2 $\theta$ )                                                                                                            |
| $\chi^2$                                           | 1.89                                                                                                                                         |
| $R_p$ / %                                          | 8.24                                                                                                                                         |
| $R_{wp}$ / %                                       | 10.50                                                                                                                                        |
| Definition of <i>R</i> factors                     | $R_p = \frac{\sum  w   I_0 - I_c ^2}{\sum  w  I_0^2};$ $R_{wp} = \left( \frac{\sum  w   I_0 - I_c ^2}{\sum  w  I_0^2} \right)^{\frac{1}{2}}$ |

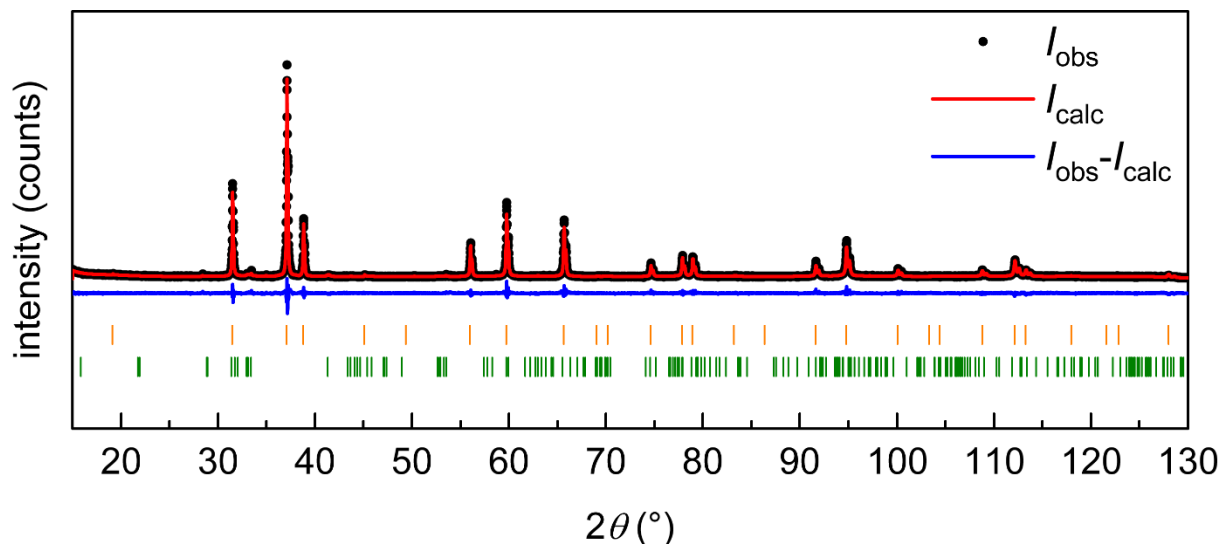

**Figure S6.** Powder X-ray diffraction pattern of CaAl<sub>2</sub> ball milled for 20 min. Black circles represent the collected data, the red line is the fit, the blue line the difference curve and the ticks represent the Bragg positions of the refined phases. The following color code applies: orange – CaAl<sub>2</sub> (*Fd* $\bar{3}$ *m*); green – CaAl<sub>4</sub> (*C2/m*).

| Refinement details for the data shown in Figure S6 |                                                                                                                                              |
|----------------------------------------------------|----------------------------------------------------------------------------------------------------------------------------------------------|
| Source                                             | Bruker D8 ADVANCE (laboratory X-ray)                                                                                                         |
| Temperature                                        | RT                                                                                                                                           |
| Pressure                                           | ambient                                                                                                                                      |
| Wavelengths                                        | Cu <i>K</i> $\alpha$ <sub>1</sub> and Cu <i>K</i> $\alpha$ <sub>2</sub> : 154.0596 and 154.4308 pm                                           |
| <i>d</i> -space range                              | 0.85-14.35 Å (6-130° 2 $\theta$ )                                                                                                            |
| $\chi^2$                                           | 1.77                                                                                                                                         |
| <i>R</i> <sub>p</sub> / %                          | 7.94                                                                                                                                         |
| <i>R</i> <sub>wp</sub> / %                         | 9.92                                                                                                                                         |
| Definition of <i>R</i> factors                     | $R_p = \frac{\sum  w   I_0 - I_c ^2}{\sum  w  I_0^2};$ $R_{wp} = \left( \frac{\sum  w   I_0 - I_c ^2}{\sum  w  I_0^2} \right)^{\frac{1}{2}}$ |

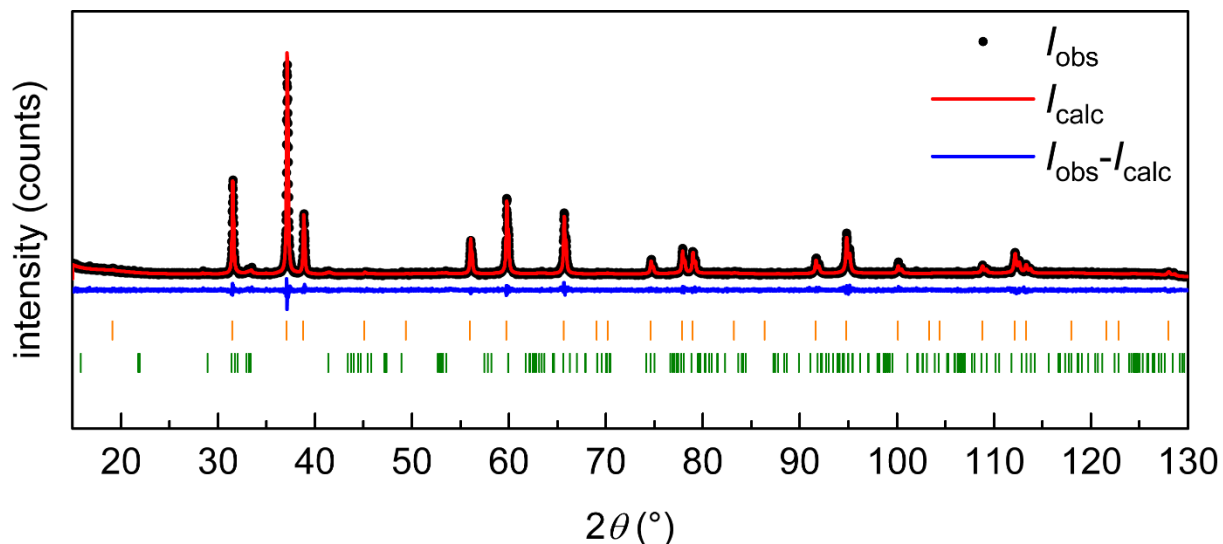

**Figure S7.** Powder X-ray diffraction pattern of CaAl<sub>2</sub> ball milled for 30 min. Black circles represent the collected data, the red line is the fit, the blue line the difference curve and the ticks represent the Bragg positions of the refined phases. The following color code applies: orange – CaAl<sub>2</sub> (*Fd* $\bar{3}$ *m*); green – CaAl<sub>4</sub> (*C2*/*m*).

| Refinement details for the data shown in Figure S7 |                                                                                                                                              |
|----------------------------------------------------|----------------------------------------------------------------------------------------------------------------------------------------------|
| Source                                             | Bruker D8 ADVANCE (laboratory X-ray)                                                                                                         |
| Temperature                                        | RT                                                                                                                                           |
| Pressure                                           | ambient                                                                                                                                      |
| Wavelengths                                        | Cu <i>K</i> $\alpha$ <sub>1</sub> and Cu <i>K</i> $\alpha$ <sub>2</sub> : 154.0596 and 154.4308 pm                                           |
| <i>d</i> -space range                              | 0.85-14.35 Å (6-130° 2 $\theta$ )                                                                                                            |
| $\chi^2$                                           | 1.18                                                                                                                                         |
| <i>R</i> <sub>p</sub> / %                          | 7.00                                                                                                                                         |
| <i>R</i> <sub>wp</sub> / %                         | 8.99                                                                                                                                         |
| Definition of <i>R</i> factors                     | $R_p = \frac{\sum  w   I_0 - I_c ^2}{\sum  w  I_0^2};$ $R_{wp} = \left( \frac{\sum  w   I_0 - I_c ^2}{\sum  w  I_0^2} \right)^{\frac{1}{2}}$ |



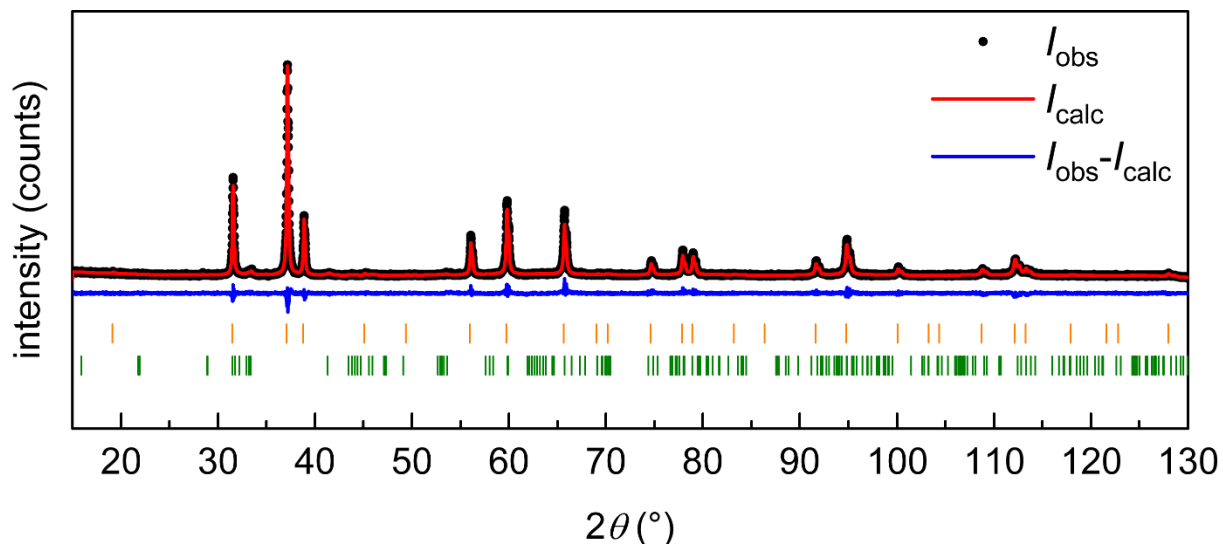

**Figure S8.** Powder X-ray diffraction pattern of CaAl<sub>2</sub> ball milled for 45 min. Black circles represent the collected data, the red line is the fit, the blue line the difference curve and the ticks represent the Bragg positions of the refined phases. The following color code applies: orange – CaAl<sub>2</sub> (*Fd* $\bar{3}$ *m*); green – CaAl<sub>4</sub> (*C2*/*m*).

| <b>Refinement details for the data shown in Figure S8</b> |                                                                                                                                              |
|-----------------------------------------------------------|----------------------------------------------------------------------------------------------------------------------------------------------|
| Source                                                    | Bruker D8 ADVANCE (laboratory X-ray)                                                                                                         |
| Temperature                                               | RT                                                                                                                                           |
| Pressure                                                  | ambient                                                                                                                                      |
| Wavelengths                                               | Cu <i>K</i> $\alpha$ <sub>1</sub> and Cu <i>K</i> $\alpha$ <sub>2</sub> : 154.0596 and 154.4308 pm                                           |
| <i>d</i> -space range                                     | 0.85-14.35 Å (6-130° 2 $\theta$ )                                                                                                            |
| $\chi^2$                                                  | 1.57                                                                                                                                         |
| <i>R</i> <sub>p</sub> / %                                 | 8.07                                                                                                                                         |
| <i>R</i> <sub>wp</sub> / %                                | 10.09                                                                                                                                        |
| Definition of <i>R</i> factors                            | $R_p = \frac{\sum  w   I_0 - I_c ^2}{\sum  w  I_0^2};$ $R_{wp} = \left( \frac{\sum  w   I_0 - I_c ^2}{\sum  w  I_0^2} \right)^{\frac{1}{2}}$ |

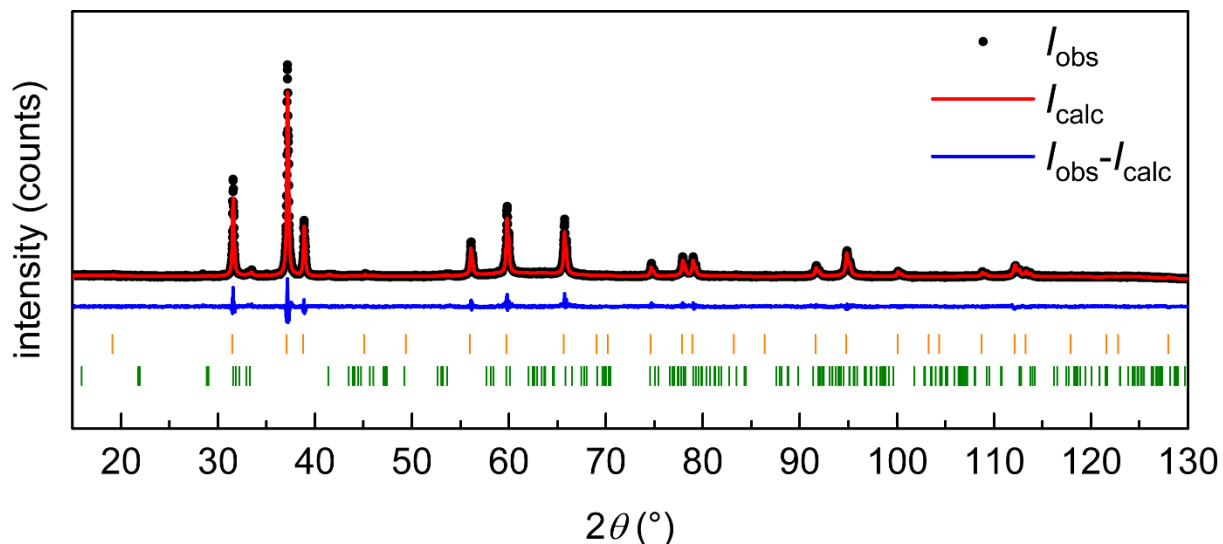

**Figure S9.** Powder X-ray diffraction pattern of CaAl<sub>2</sub> ball milled for 60 min. Black circles represent the collected data, the red line is the fit, the blue line the difference curve and the ticks represent the Bragg positions of the refined phases. The following color code applies: orange – CaAl<sub>2</sub> (*Fd* $\bar{3}$ *m*); green – CaAl<sub>4</sub> (*C2/m*).

| Refinement details for the data shown in Figure S9 |                                                                                                                                              |
|----------------------------------------------------|----------------------------------------------------------------------------------------------------------------------------------------------|
| Source                                             | Bruker D8 ADVANCE (laboratory X-ray)                                                                                                         |
| Temperature                                        | RT                                                                                                                                           |
| Pressure                                           | ambient                                                                                                                                      |
| Wavelengths                                        | Cu <i>K</i> $\alpha$ <sub>1</sub> and Cu <i>K</i> $\alpha$ <sub>2</sub> : 154.0596 and 154.4308 pm                                           |
| <i>d</i> -space range                              | 0.85-14.35 Å (6-130° 2 $\theta$ )                                                                                                            |
| $\chi^2$                                           | 2.10                                                                                                                                         |
| <i>R</i> <sub>p</sub> / %                          | 8.43                                                                                                                                         |
| <i>R</i> <sub>wp</sub> / %                         | 10.72                                                                                                                                        |
| Definition of <i>R</i> factors                     | $R_p = \frac{\sum  w   I_0 - I_c ^2}{\sum  w  I_0^2};$ $R_{wp} = \left( \frac{\sum  w   I_0 - I_c ^2}{\sum  w  I_0^2} \right)^{\frac{1}{2}}$ |

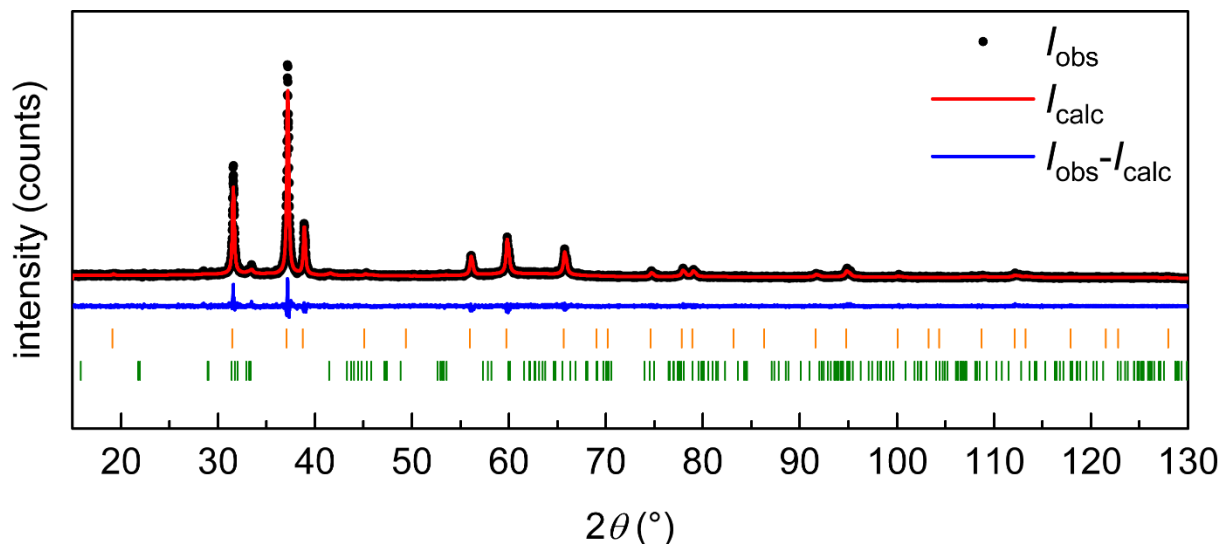

**Figure S10.** Powder X-ray diffraction pattern of CaAl<sub>2</sub> ball milled for 90 min. Black circles represent the collected data, the red line is the fit, the blue line the difference curve and the ticks represent the Bragg positions of the refined phases. The following color code applies: orange – CaAl<sub>2</sub> (*Fd* $\bar{3}$ *m*); green – CaAl<sub>4</sub> (*C2*/*m*).

| <b>Refinement details for the data shown in Figure S10</b> |                                                                                                                                              |
|------------------------------------------------------------|----------------------------------------------------------------------------------------------------------------------------------------------|
| Source                                                     | Bruker D8 ADVANCE (laboratory X-ray)                                                                                                         |
| Temperature                                                | RT                                                                                                                                           |
| Pressure                                                   | ambient                                                                                                                                      |
| Wavelengths                                                | Cu <i>K</i> $\alpha$ <sub>1</sub> and Cu <i>K</i> $\alpha$ <sub>2</sub> : 154.0596 and 154.4308 pm                                           |
| <i>d</i> -space range                                      | 0.85-14.35 Å (6-130° 2 $\theta$ )                                                                                                            |
| $\chi^2$                                                   | 1.27                                                                                                                                         |
| <i>R</i> <sub>p</sub> / %                                  | 10.62                                                                                                                                        |
| <i>R</i> <sub>wp</sub> / %                                 | 13.89                                                                                                                                        |
| Definition of <i>R</i> factors                             | $R_p = \frac{\sum  w   I_0 - I_c ^2}{\sum  w  I_0^2};$ $R_{wp} = \left( \frac{\sum  w   I_0 - I_c ^2}{\sum  w  I_0^2} \right)^{\frac{1}{2}}$ |

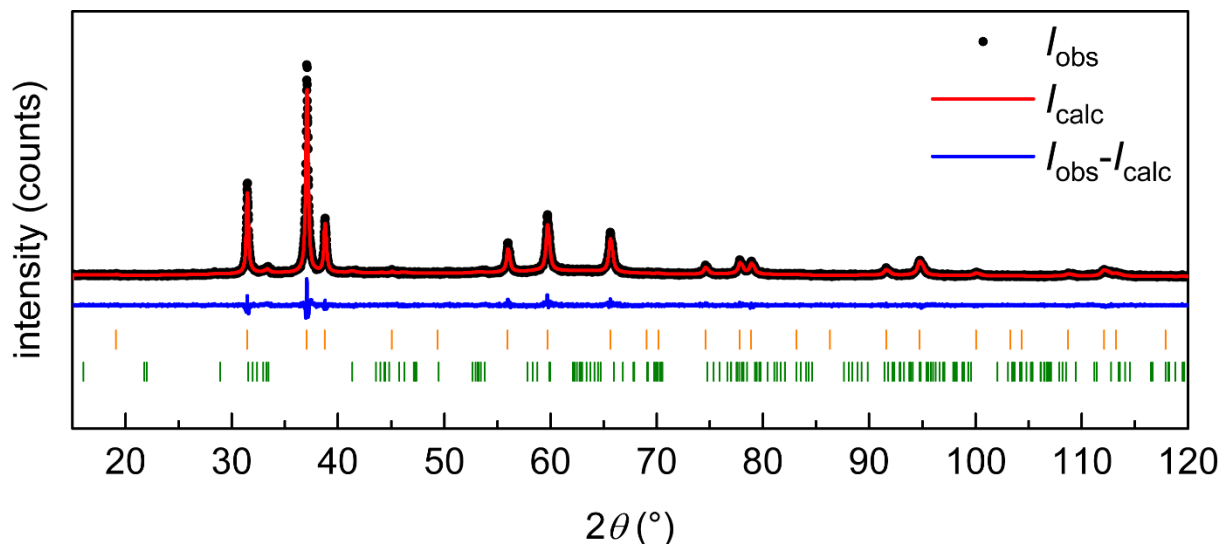

**Figure S11.** Powder X-ray diffraction pattern of CaAl<sub>2</sub> ball milled for 180 min. Black circles represent the collected data, the red line is the fit, the blue line the difference curve and the ticks represent the Bragg positions of the refined phases. The following color code applies: orange – CaAl<sub>2</sub> (*Fd* $\bar{3}$ *m*); green – CaAl<sub>4</sub> (*C2/m*).

| Refinement details for the data shown in Figure S11 |                                                                                                                                              |
|-----------------------------------------------------|----------------------------------------------------------------------------------------------------------------------------------------------|
| Source                                              | Bruker D8 ADVANCE (laboratory X-ray)                                                                                                         |
| Temperature                                         | RT                                                                                                                                           |
| Pressure                                            | ambient                                                                                                                                      |
| Wavelengths                                         | Cu <i>K</i> $\alpha_1$ and Cu <i>K</i> $\alpha_2$ : 154.0596 and 154.4308 pm                                                                 |
| <i>d</i> -space range                               | 0.85-14.35 Å (6-130° 2 $\theta$ )                                                                                                            |
| $\chi^2$                                            | 1.34                                                                                                                                         |
| <i>R</i> <sub>p</sub> / %                           | 7.25                                                                                                                                         |
| <i>R</i> <sub>wp</sub> / %                          | 9.14                                                                                                                                         |
| Definition of <i>R</i> factors                      | $R_p = \frac{\sum  w   I_0 - I_c ^2}{\sum  w  I_0^2};$ $R_{wp} = \left( \frac{\sum  w   I_0 - I_c ^2}{\sum  w  I_0^2} \right)^{\frac{1}{2}}$ |

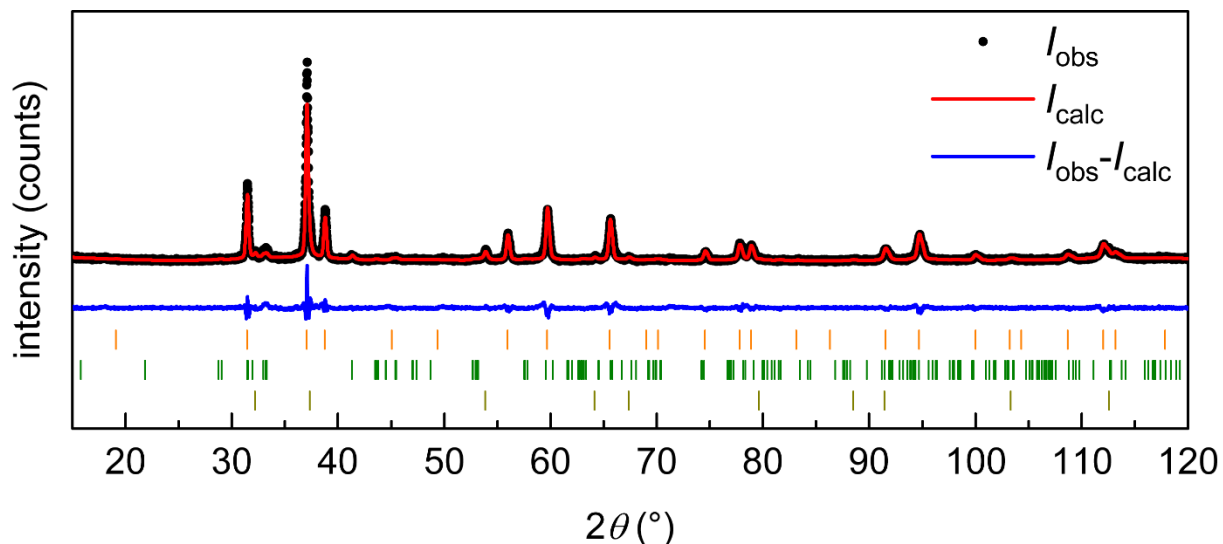

**Figure S12.** Powder X-ray diffraction pattern of  $\text{CaAl}_2$  ball milled for 180 min after the pyrolytic reaction. Black circles represent the collected data, the red line is the fit, the blue line the difference curve and the ticks represent the Bragg positions of the refined phases. The following color code applies: orange –  $\text{CaAl}_2$  ( $Fd\bar{3}m$ ); green –  $\text{CaAl}_4$  ( $C2/m$ ); olive –  $\text{CaO}$  ( $Fm\bar{3}m$ ).

| <b>Refinement details for the data shown in Figure S12</b> |                                                                                                                                              |
|------------------------------------------------------------|----------------------------------------------------------------------------------------------------------------------------------------------|
| Source                                                     | Bruker D8 ADVANCE (laboratory X-ray)                                                                                                         |
| Temperature                                                | RT                                                                                                                                           |
| Pressure                                                   | ambient                                                                                                                                      |
| Wavelengths                                                | $\text{Cu } K\alpha_1$ and $\text{Cu } K\alpha_2$ : 154.0596 and 154.4308 pm                                                                 |
| $d$ -space range                                           | 0.85-14.35 Å (6-130° $2\theta$ )                                                                                                             |
| $\chi^2$                                                   | 1.62                                                                                                                                         |
| $R_p$ / %                                                  | 6.58                                                                                                                                         |
| $R_{wp}$ / %                                               | 8.44                                                                                                                                         |
| Definition of $R$ factors                                  | $R_p = \frac{\sum  w   I_0 - I_c ^2}{\sum  w  I_0^2};$ $R_{wp} = \left( \frac{\sum  w   I_0 - I_c ^2}{\sum  w  I_0^2} \right)^{\frac{1}{2}}$ |

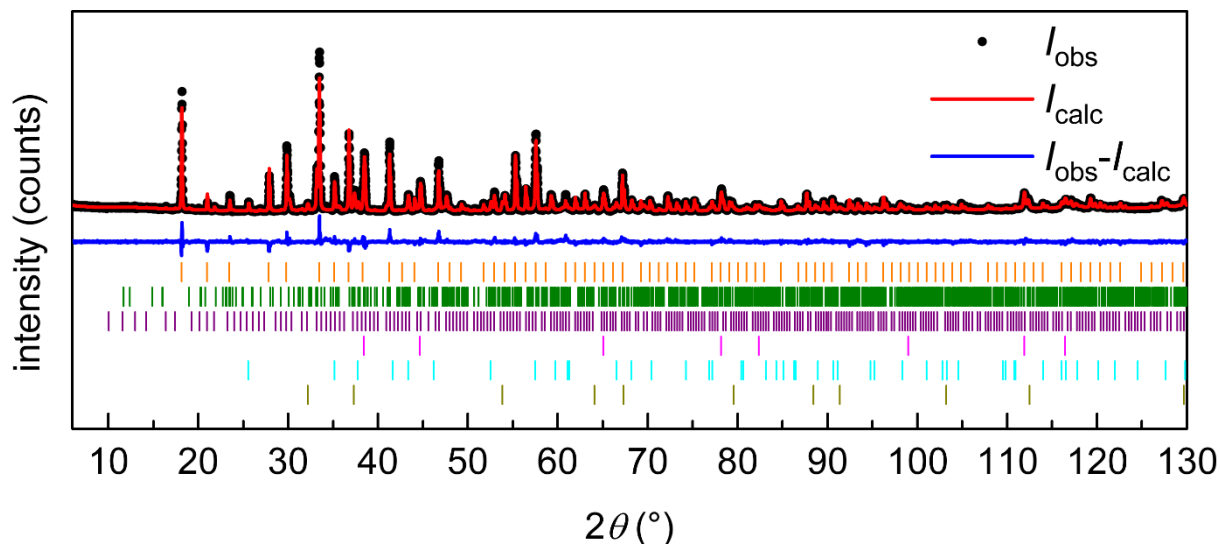

**Figure S13.** Powder X-ray diffraction pattern of pristine  $\text{CaAl}_2$  and oxidized during thermal analysis. Black circles represent the collected data, the red line is the fit, the blue line the difference curve and the ticks represent the Bragg positions of the refined phases. The following color code applies: orange –  $\text{Ca}_{12}\text{Al}_{14}\text{O}_{33}$  ( $I\bar{4}3d$ ); green –  $\text{CaAl}_2\text{O}_4$  ( $P2_1/c$ ); purple –  $\text{Ca}_3\text{Al}_2\text{O}_6$  ( $Pa\bar{3}$ ); pink –  $\text{Al}$  ( $Fm\bar{3}m$ ); cyan –  $\text{Al}_2\text{O}_3$  ( $R\bar{3}c$ ); olive –  $\text{CaO}$  ( $Fm\bar{3}m$ ).

| Refinement details for the data shown in Figure S13 |                                                                                                                                             |
|-----------------------------------------------------|---------------------------------------------------------------------------------------------------------------------------------------------|
| Source                                              | Bruker D8 ADVANCE (laboratory X-ray)                                                                                                        |
| Temperature                                         | RT                                                                                                                                          |
| Pressure                                            | ambient                                                                                                                                     |
| Wavelengths                                         | $\text{Cu } K\alpha_1$ and $\text{Cu } K\alpha_2$ : 154.0596 and 154.4308 pm                                                                |
| $d$ -space range                                    | 0.85-14.35 Å (6-130° $2\theta$ )                                                                                                            |
| $\chi^2$                                            | 4.34                                                                                                                                        |
| $R_p$ / %                                           | 6.67                                                                                                                                        |
| $R_{wp}$ / %                                        | 9.06                                                                                                                                        |
| Definition of $R$ factors                           | $R_p = \frac{\sum  w   I_0 - I_c ^2}{\sum  w I_0^2 }$ $R_{wp} = \left( \frac{\sum  w   I_0 - I_c ^2}{\sum  w I_0^2 } \right)^{\frac{1}{2}}$ |

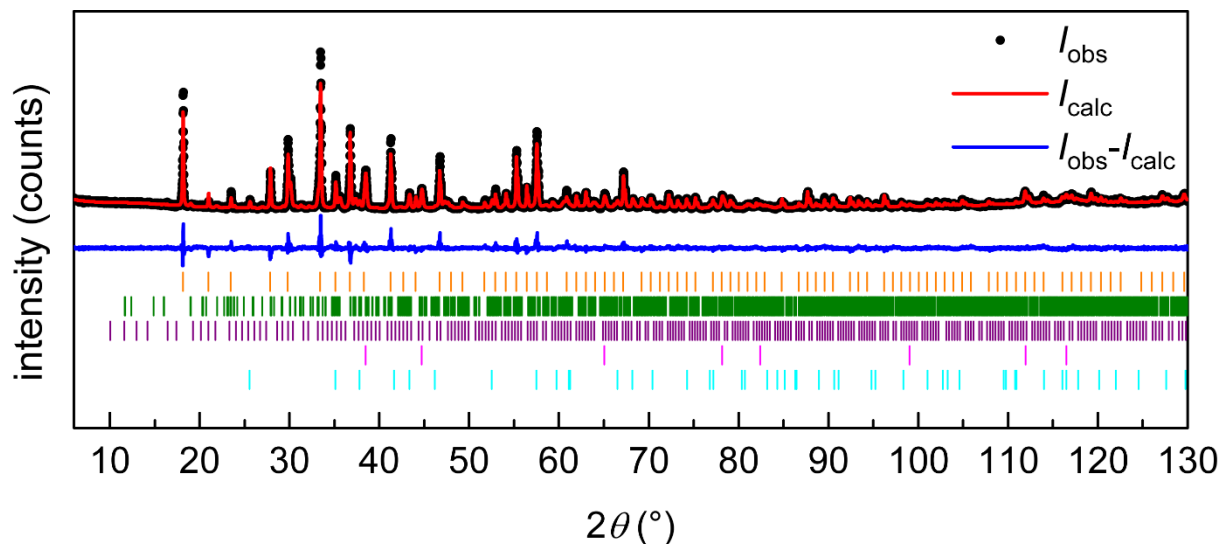

**Figure S14.** Powder X-ray diffraction pattern of CaAl<sub>2</sub> ball milled for 5 min and oxidized during thermal analysis. Black circles represent the collected data, the red line is the fit, the blue line the difference curve and the ticks represent the Bragg positions of the refined phases. The following color code applies: orange – Ca<sub>12</sub>Al<sub>14</sub>O<sub>33</sub> ( $I\bar{4}3d$ ); green – CaAl<sub>2</sub>O<sub>4</sub> ( $P2_1/c$ ); purple – Ca<sub>3</sub>Al<sub>2</sub>O<sub>6</sub> ( $Pa\bar{3}$ ); pink – Al ( $Fm\bar{3}m$ ); cyan – Al<sub>2</sub>O<sub>3</sub> ( $R\bar{3}c$ ); olive – CaO ( $Fm\bar{3}m$ ).

| <b>Refinement details for the data shown in Figure S14</b> |                                                                                                                                             |
|------------------------------------------------------------|---------------------------------------------------------------------------------------------------------------------------------------------|
| Source                                                     | Bruker D8 ADVANCE (laboratory X-ray)                                                                                                        |
| Temperature                                                | RT                                                                                                                                          |
| Pressure                                                   | ambient                                                                                                                                     |
| Wavelengths                                                | Cu $K\alpha_1$ and Cu $K\alpha_2$ : 154.0596 and 154.4308 pm                                                                                |
| $d$ -space range                                           | 0.85-14.35 Å (6-130° $2\theta$ )                                                                                                            |
| $\chi^2$                                                   | 3.59                                                                                                                                        |
| $R_p$ / %                                                  | 6.56                                                                                                                                        |
| $R_{wp}$ / %                                               | 8.81                                                                                                                                        |
| Definition of $R$ factors                                  | $R_p = \frac{\sum  w   I_0 - I_c ^2}{\sum  w I_0^2 }$ $R_{wp} = \left( \frac{\sum  w   I_0 - I_c ^2}{\sum  w I_0^2 } \right)^{\frac{1}{2}}$ |

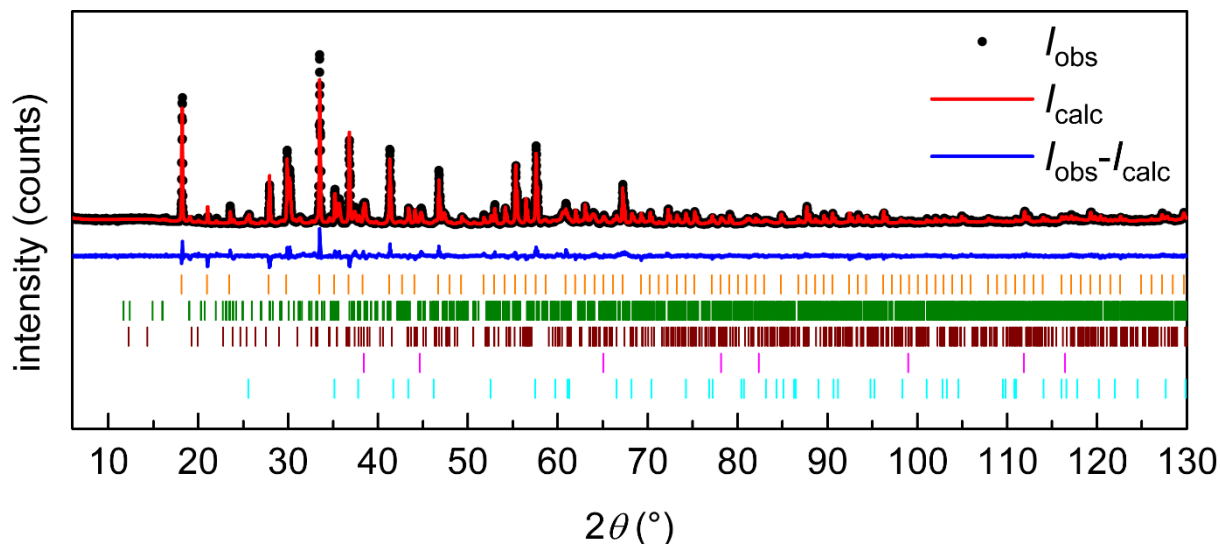

**Figure S15.** Powder X-ray diffraction pattern of CaAl<sub>2</sub> ball milled for 10 min and oxidized during thermal analysis. Black circles represent the collected data, the red line is the fit, the blue line the difference curve and the ticks represent the Bragg positions of the refined phases. The following color code applies: orange – Ca<sub>12</sub>Al<sub>14</sub>O<sub>33</sub> ( $I\bar{4}3d$ ); green – CaAl<sub>2</sub>O<sub>4</sub> ( $P2_1/c$ ); purple – Ca<sub>3</sub>Al<sub>2</sub>O<sub>6</sub> ( $Pa\bar{3}$ ); pink – Al ( $Fm\bar{3}m$ ); cyan – Al<sub>2</sub>O<sub>3</sub> ( $R\bar{3}c$ ); olive – CaO ( $Fm\bar{3}m$ ).

| Refinement details for the data shown in Figure S15 |                                                                                                                                              |
|-----------------------------------------------------|----------------------------------------------------------------------------------------------------------------------------------------------|
| Source                                              | Bruker D8 ADVANCE (laboratory X-ray)                                                                                                         |
| Temperature                                         | RT                                                                                                                                           |
| Pressure                                            | ambient                                                                                                                                      |
| Wavelengths                                         | Cu $K\alpha_1$ and Cu $K\alpha_2$ : 154.0596 and 154.4308 pm                                                                                 |
| $d$ -space range                                    | 0.85-14.35 Å (6-130° 2 $\theta$ )                                                                                                            |
| $\chi^2$                                            | 4.40                                                                                                                                         |
| $R_p$ / %                                           | 6.88                                                                                                                                         |
| $R_{wp}$ / %                                        | 9.29                                                                                                                                         |
| Definition of $R$ factors                           | $R_p = \frac{\sum  w   I_0 - I_c ^2}{\sum  w  I_0^2};$ $R_{wp} = \left( \frac{\sum  w   I_0 - I_c ^2}{\sum  w  I_0^2} \right)^{\frac{1}{2}}$ |



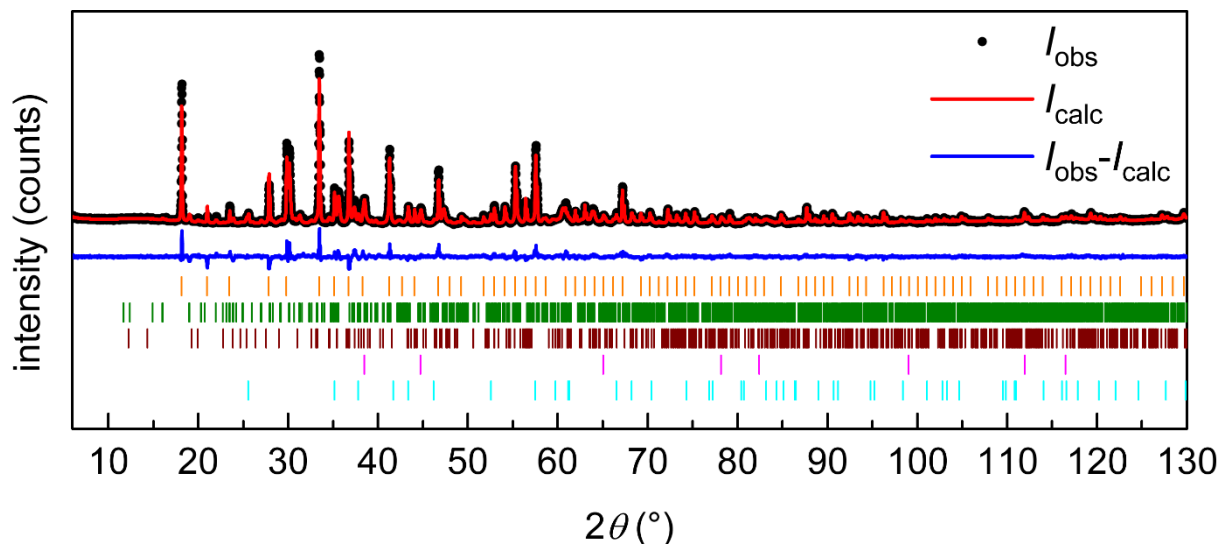

**Figure S16.** Powder X-ray diffraction pattern of CaAl<sub>2</sub> ball milled for 15 min and oxidized during thermal analysis. Black circles represent the collected data, the red line is the fit, the blue line the difference curve and the ticks represent the Bragg positions of the refined phases. The following color code applies: orange – Ca<sub>12</sub>Al<sub>14</sub>O<sub>33</sub> ( $I\bar{4}3d$ ); green – CaAl<sub>2</sub>O<sub>4</sub> ( $P2_1/c$ ); purple – Ca<sub>3</sub>Al<sub>2</sub>O<sub>6</sub> ( $Pa\bar{3}$ ); pink – Al ( $Fm\bar{3}m$ ); cyan – Al<sub>2</sub>O<sub>3</sub> ( $R\bar{3}c$ ); olive – CaO ( $Fm\bar{3}m$ ).

| Refinement details for the data shown in Figure S16 |                                                                                                                                              |
|-----------------------------------------------------|----------------------------------------------------------------------------------------------------------------------------------------------|
| Source                                              | Bruker D8 ADVANCE (laboratory X-ray)                                                                                                         |
| Temperature                                         | RT                                                                                                                                           |
| Pressure                                            | ambient                                                                                                                                      |
| Wavelengths                                         | Cu $K\alpha_1$ and Cu $K\alpha_2$ : 154.0596 and 154.4308 pm                                                                                 |
| $d$ -space range                                    | 0.85-14.35 Å (6-130° 2 $\theta$ )                                                                                                            |
| $\chi^2$                                            | 5.12                                                                                                                                         |
| $R_p$ / %                                           | 7.18                                                                                                                                         |
| $R_{wp}$ / %                                        | 9.73                                                                                                                                         |
| Definition of $R$ factors                           | $R_p = \frac{\sum  w   I_0 - I_c ^2}{\sum  w  I_0^2};$ $R_{wp} = \left( \frac{\sum  w   I_0 - I_c ^2}{\sum  w  I_0^2} \right)^{\frac{1}{2}}$ |

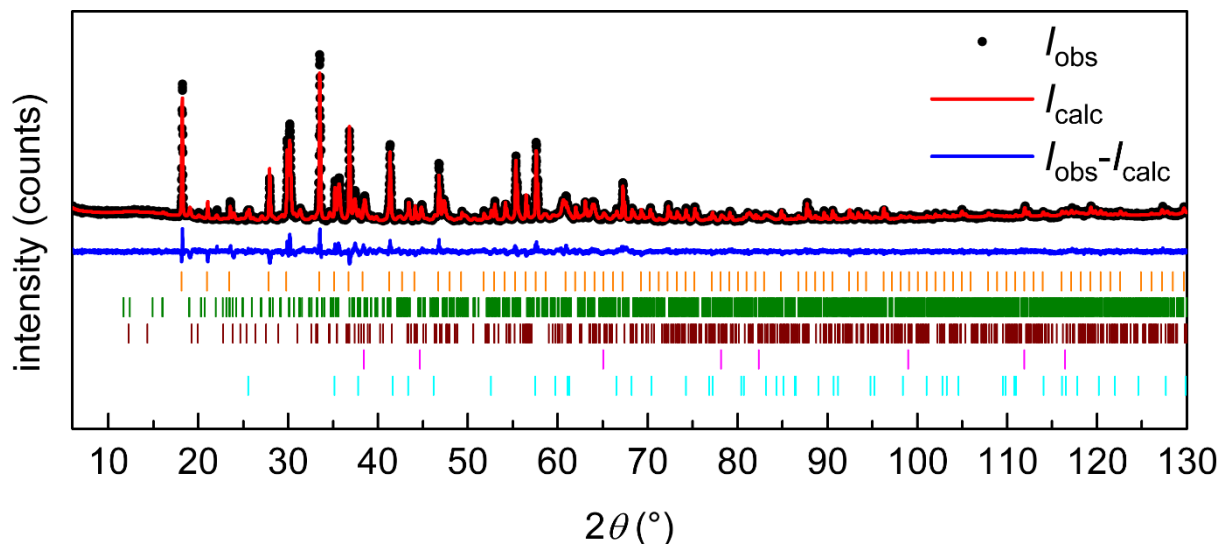

**Figure S17.** Powder X-ray diffraction pattern of CaAl<sub>2</sub> ball milled for 20 min and oxidized during thermal analysis. Black circles represent the collected data, the red line is the fit, the blue line the difference curve and the ticks represent the Bragg positions of the refined phases. The following color code applies: orange – Ca<sub>12</sub>Al<sub>14</sub>O<sub>33</sub> ( $I\bar{4}3d$ ); green – CaAl<sub>2</sub>O<sub>4</sub> ( $P2_1/c$ ); purple – Ca<sub>3</sub>Al<sub>2</sub>O<sub>6</sub> ( $Pa\bar{3}$ ); pink – Al ( $Fm\bar{3}m$ ); cyan – Al<sub>2</sub>O<sub>3</sub> ( $R\bar{3}c$ ); olive – CaO ( $Fm\bar{3}m$ ).

| Refinement details for the data shown in Figure S17 |                                                                                                                                              |
|-----------------------------------------------------|----------------------------------------------------------------------------------------------------------------------------------------------|
| Source                                              | Bruker D8 ADVANCE (laboratory X-ray)                                                                                                         |
| Temperature                                         | RT                                                                                                                                           |
| Pressure                                            | ambient                                                                                                                                      |
| Wavelengths                                         | Cu $K\alpha_1$ and Cu $K\alpha_2$ : 154.0596 and 154.4308 pm                                                                                 |
| $d$ -space range                                    | 0.85-14.35 Å (6-130° 2θ)                                                                                                                     |
| $\chi^2$                                            | 3.10                                                                                                                                         |
| $R_p$ / %                                           | 6.37                                                                                                                                         |
| $R_{wp}$ / %                                        | 8.49                                                                                                                                         |
| Definition of $R$ factors                           | $R_p = \frac{\sum  w   I_0 - I_c ^2}{\sum  w  I_0^2};$ $R_{wp} = \left( \frac{\sum  w   I_0 - I_c ^2}{\sum  w  I_0^2} \right)^{\frac{1}{2}}$ |

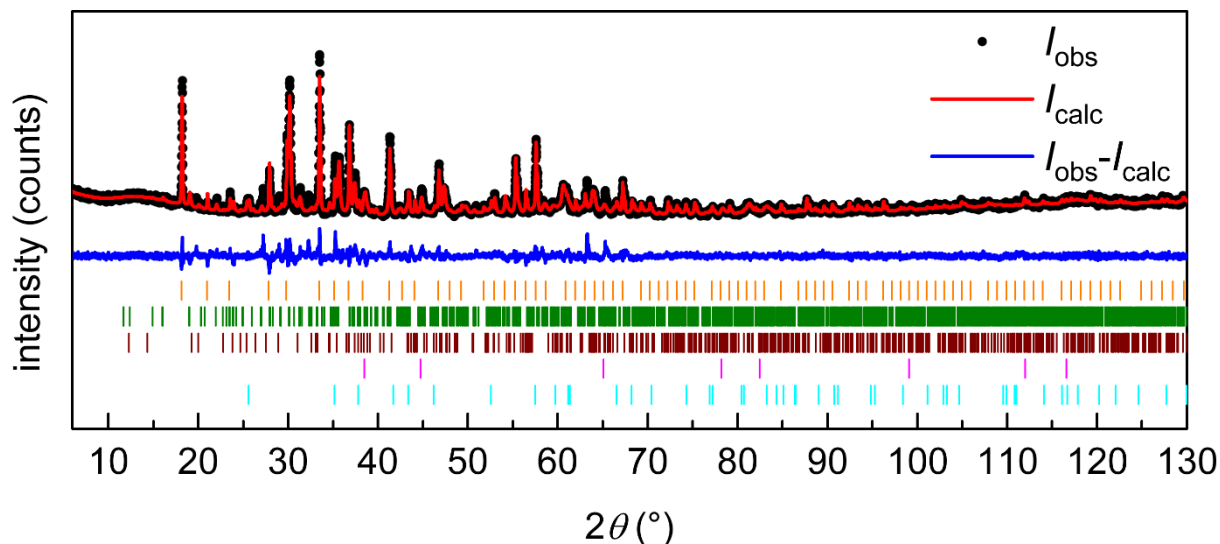

**Figure S18.** Powder X-ray diffraction pattern of CaAl<sub>2</sub> ball milled for 30 min and oxidized during thermal analysis. Black circles represent the collected data, the red line is the fit, the blue line the difference curve and the ticks represent the Bragg positions of the refined phases. The following color code applies: orange – Ca<sub>12</sub>Al<sub>14</sub>O<sub>33</sub> ( $I\bar{4}3d$ ); green – CaAl<sub>2</sub>O<sub>4</sub> ( $P2_1/c$ ); purple – Ca<sub>3</sub>Al<sub>2</sub>O<sub>6</sub> ( $Pa\bar{3}$ ); pink – Al ( $Fm\bar{3}m$ ); cyan – Al<sub>2</sub>O<sub>3</sub> ( $R\bar{3}c$ ); olive – CaO ( $Fm\bar{3}m$ ).

| <b>Refinement details for the data shown in Figure S18</b> |                                                                                                                                              |
|------------------------------------------------------------|----------------------------------------------------------------------------------------------------------------------------------------------|
| Source                                                     | Bruker D8 ADVANCE (laboratory X-ray)                                                                                                         |
| Temperature                                                | RT                                                                                                                                           |
| Pressure                                                   | ambient                                                                                                                                      |
| Wavelengths                                                | Cu $K\alpha_1$ and Cu $K\alpha_2$ : 154.0596 and 154.4308 pm                                                                                 |
| $d$ -space range                                           | 0.85-14.35 Å (6-130° $2\theta$ )                                                                                                             |
| $\chi^2$                                                   | 3.08                                                                                                                                         |
| $R_p$ / %                                                  | 6.57                                                                                                                                         |
| $R_{wp}$ / %                                               | 9.06                                                                                                                                         |
| Definition of $R$ factors                                  | $R_p = \frac{\sum  w   I_0 - I_c ^2}{\sum  w  I_0^2};$ $R_{wp} = \left( \frac{\sum  w   I_0 - I_c ^2}{\sum  w  I_0^2} \right)^{\frac{1}{2}}$ |

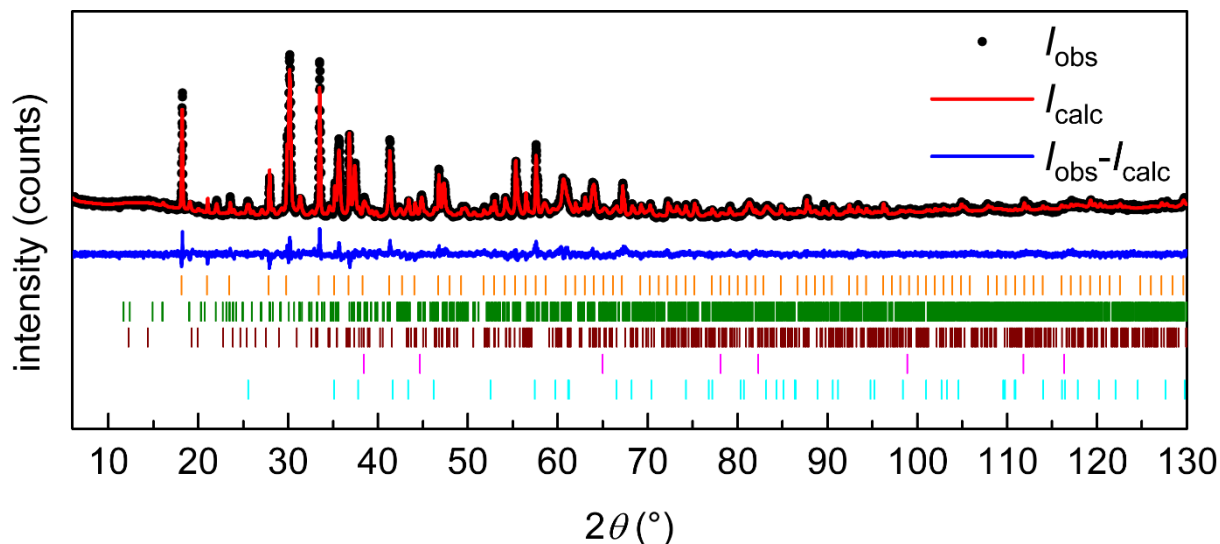

**Figure S19.** Powder X-ray diffraction pattern of CaAl<sub>2</sub> ball milled for 45 min and oxidized during thermal analysis. Black circles represent the collected data, the red line is the fit, the blue line the difference curve and the ticks represent the Bragg positions of the refined phases. The following color code applies: orange – Ca<sub>12</sub>Al<sub>14</sub>O<sub>33</sub> ( $I\bar{4}3d$ ); green – CaAl<sub>2</sub>O<sub>4</sub> ( $P2_1/c$ ); purple – Ca<sub>3</sub>Al<sub>2</sub>O<sub>6</sub> ( $Pa\bar{3}$ ); pink – Al ( $Fm\bar{3}m$ ); cyan – Al<sub>2</sub>O<sub>3</sub> ( $R\bar{3}c$ ); olive – CaO ( $Fm\bar{3}m$ ).

| <b>Refinement details for the data shown in Figure S19</b> |                                                              |
|------------------------------------------------------------|--------------------------------------------------------------|
| Source                                                     | Bruker D8 ADVANCE (laboratory X-ray)                         |
| Temperature                                                | RT                                                           |
| Pressure                                                   | ambient                                                      |
| Wavelengths                                                | Cu $K\alpha_1$ and Cu $K\alpha_2$ : 154.0596 and 154.4308 pm |
| $d$ -space range                                           | 0.85-14.35 Å (6-130° $2\theta$ )                             |
| $\chi^2$                                                   | 2.46                                                         |
| $R_p$ / %                                                  | 5.93                                                         |
| $R_{wp}$ / %                                               | 7.73                                                         |
| Definition of $R$ factors                                  | $R_p = \frac{\sum  w   I_0 - I_c ^2}{\sum  w I_0^2 }^{1/2}$  |

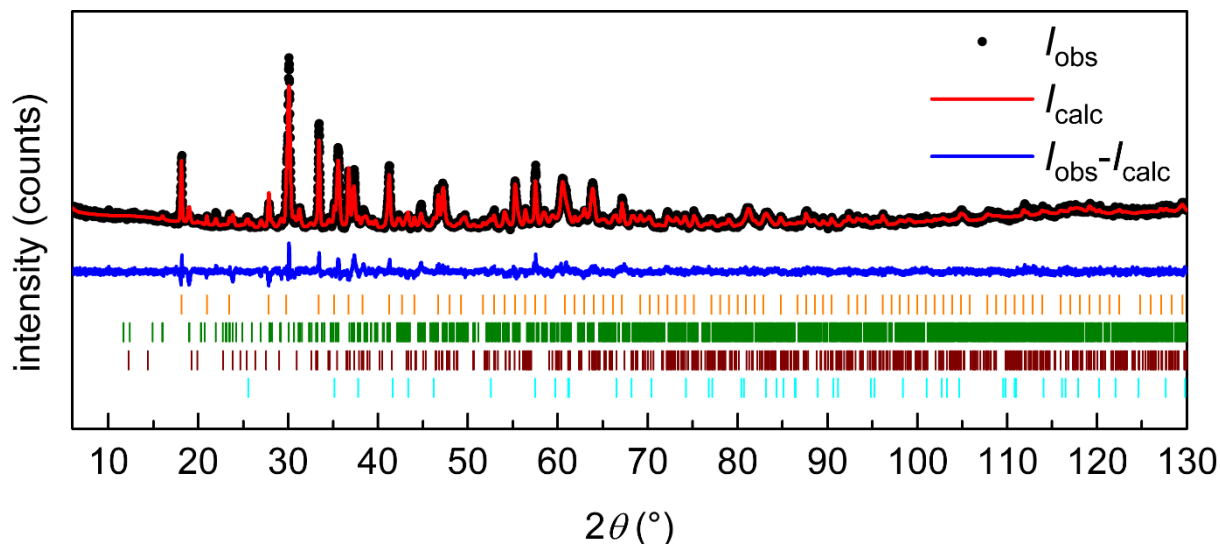

**Figure S20.** Powder X-ray diffraction pattern of CaAl<sub>2</sub> ball milled for 60 min and oxidized during thermal analysis. Black circles represent the collected data, the red line is the fit, the blue line the difference curve and the ticks represent the Bragg positions of the refined phases. The following color code applies: orange – Ca<sub>12</sub>Al<sub>14</sub>O<sub>33</sub> ( $I\bar{4}3d$ ); green – CaAl<sub>2</sub>O<sub>4</sub> ( $P2_1/c$ ); purple – Ca<sub>3</sub>Al<sub>2</sub>O<sub>6</sub> ( $Pa\bar{3}$ ); pink – Al ( $Fm\bar{3}m$ ); cyan – Al<sub>2</sub>O<sub>3</sub> ( $R\bar{3}c$ ); olive – CaO ( $Fm\bar{3}m$ ).

| <b>Refinement details for the data shown in Figure S20</b> |                                                                                                                                             |
|------------------------------------------------------------|---------------------------------------------------------------------------------------------------------------------------------------------|
| Source                                                     | Bruker D8 ADVANCE (laboratory X-ray)                                                                                                        |
| Temperature                                                | RT                                                                                                                                          |
| Pressure                                                   | ambient                                                                                                                                     |
| Wavelengths                                                | Cu $K\alpha_1$ and Cu $K\alpha_2$ : 154.0596 and 154.4308 pm                                                                                |
| $d$ -space range                                           | 0.85-14.35 Å (6-130° $2\theta$ )                                                                                                            |
| $\chi^2$                                                   | 2.68                                                                                                                                        |
| $R_p$ / %                                                  | 6.02                                                                                                                                        |
| $R_{wp}$ / %                                               | 7.91                                                                                                                                        |
| Definition of $R$ factors                                  | $R_p = \frac{\sum  w   I_0 - I_c ^2}{\sum  w  I_0^2}$ $R_{wp} = \left( \frac{\sum  w   I_0 - I_c ^2}{\sum  w  I_0^2} \right)^{\frac{1}{2}}$ |

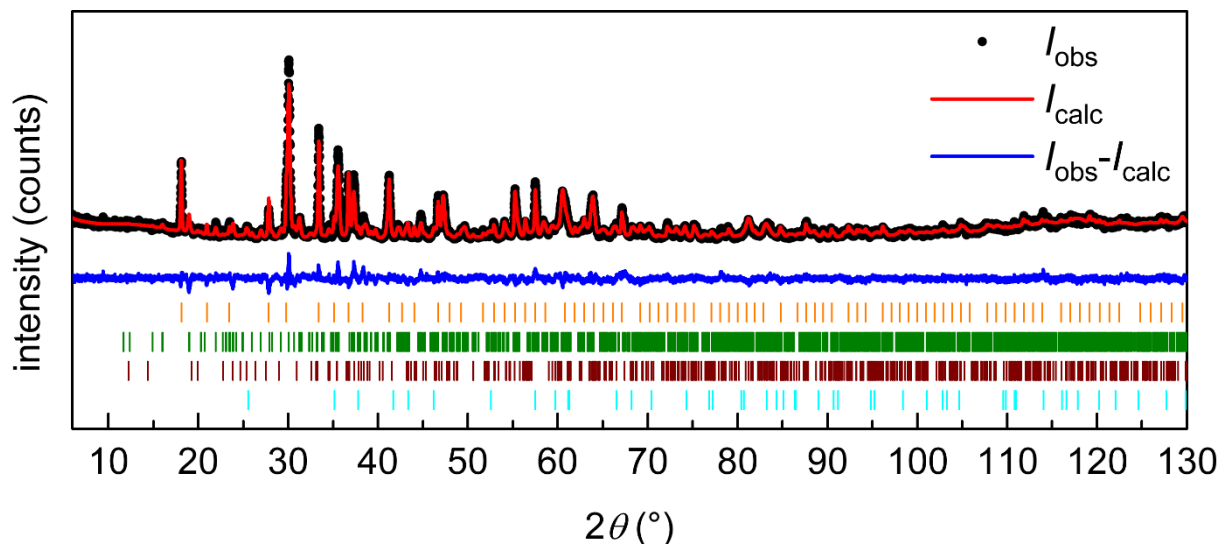

**Figure S21.** Powder X-ray diffraction pattern of CaAl<sub>2</sub> ball milled for 90 min and oxidized during thermal analysis. Black circles represent the collected data, the red line is the fit, the blue line the difference curve and the ticks represent the Bragg positions of the refined phases. The following color code applies: orange – Ca<sub>12</sub>Al<sub>14</sub>O<sub>33</sub> ( $I\bar{4}3d$ ); green – CaAl<sub>2</sub>O<sub>4</sub> ( $P2_1/c$ ); dark red – CaAl<sub>4</sub>O<sub>7</sub> ( $C2/c$ ); cyan – Al<sub>2</sub>O<sub>3</sub> ( $R\bar{3}c$ ).

| Refinement details for the data shown in Figure S21 |                                                                                                                                              |
|-----------------------------------------------------|----------------------------------------------------------------------------------------------------------------------------------------------|
| Source                                              | Bruker D8 ADVANCE (laboratory X-ray)                                                                                                         |
| Temperature                                         | RT                                                                                                                                           |
| Pressure                                            | ambient                                                                                                                                      |
| Wavelengths                                         | Cu $K\alpha_1$ and Cu $K\alpha_2$ : 154.0596 and 154.4308 pm                                                                                 |
| $d$ -space range                                    | 0.85-14.35 Å (6-130° $2\theta$ )                                                                                                             |
| $\chi^2$                                            | 2.71                                                                                                                                         |
| $R_p$ / %                                           | 6.26                                                                                                                                         |
| $R_{wp}$ / %                                        | 8.26                                                                                                                                         |
| Definition of $R$ factors                           | $R_p = \frac{\sum  w   I_0 - I_c ^2}{\sum  w  I_0^2};$ $R_{wp} = \left( \frac{\sum  w   I_0 - I_c ^2}{\sum  w  I_0^2} \right)^{\frac{1}{2}}$ |

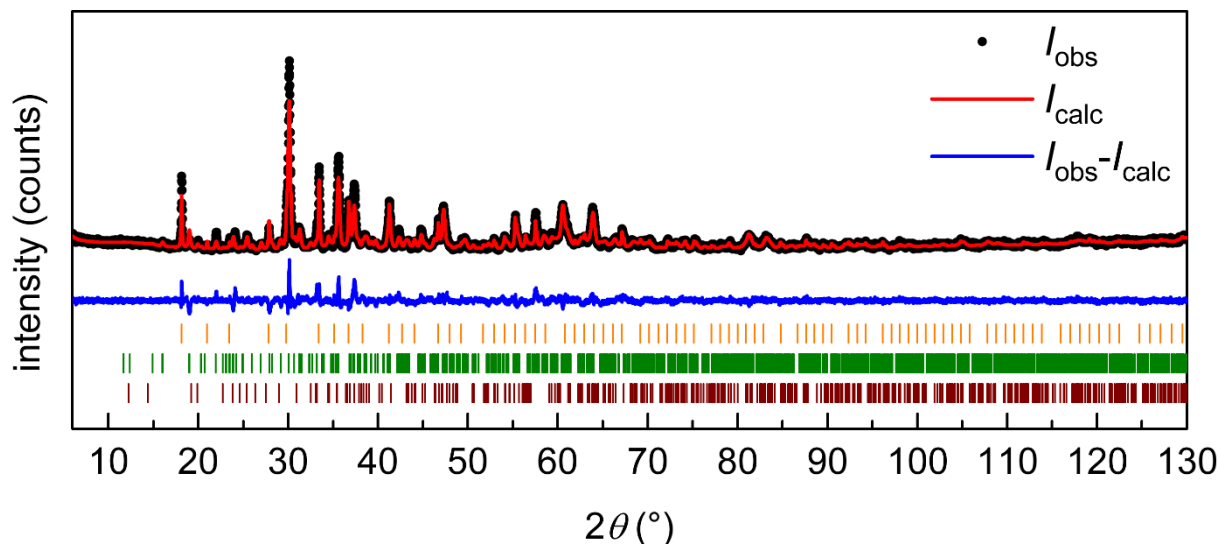

**Figure S22.** Powder X-ray diffraction pattern of CaAl<sub>2</sub> ball milled for 180 min and oxidized during thermal analysis. Black circles represent the collected data, the red line is the fit, the blue line the difference curve and the ticks represent the Bragg positions of the refined phases. The following color code applies: orange – Ca<sub>12</sub>Al<sub>14</sub>O<sub>33</sub> ( $I\bar{4}3d$ ); green – CaAl<sub>2</sub>O<sub>4</sub> ( $P2_1/c$ ); dark red – CaAl<sub>4</sub>O<sub>7</sub> ( $C2/c$ ).

| Refinement details for the data shown in Figure S22 |                                                                                                                                              |
|-----------------------------------------------------|----------------------------------------------------------------------------------------------------------------------------------------------|
| Source                                              | Bruker D8 ADVANCE (laboratory X-ray)                                                                                                         |
| Temperature                                         | RT                                                                                                                                           |
| Pressure                                            | ambient                                                                                                                                      |
| Wavelengths                                         | Cu $K\alpha_1$ and Cu $K\alpha_2$ : 154.0596 and 154.4308 pm                                                                                 |
| $d$ -space range                                    | 0.85-14.35 Å (6-130° $2\theta$ )                                                                                                             |
| $\chi^2$                                            | 3.06                                                                                                                                         |
| $R_p$ / %                                           | 8.03                                                                                                                                         |
| $R_{wp}$ / %                                        | 10.84                                                                                                                                        |
| Definition of $R$ factors                           | $R_p = \frac{\sum  w   I_0 - I_c ^2}{\sum  w I_0^2 };$ $R_{wp} = \left( \frac{\sum  w   I_0 - I_c ^2}{\sum  w I_0^2 } \right)^{\frac{1}{2}}$ |

## Thermal analysis

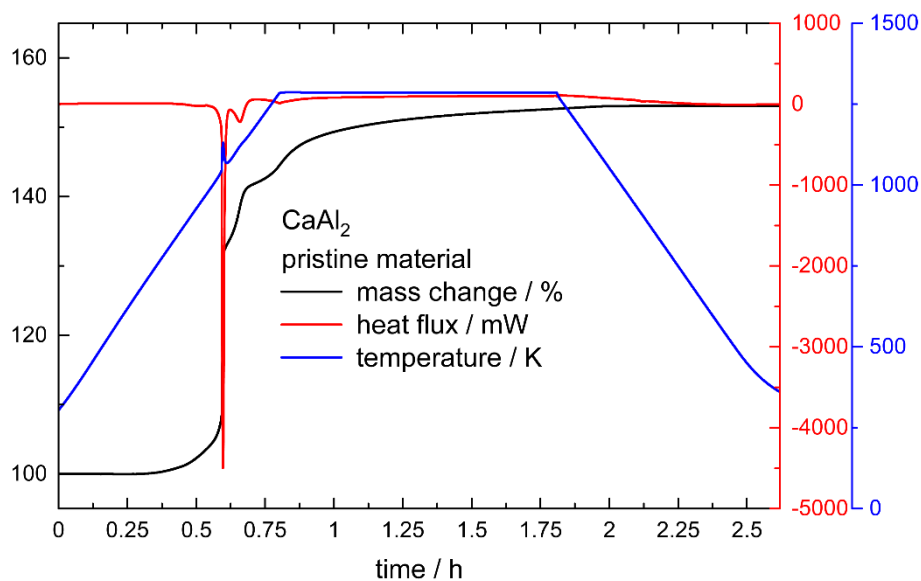

**Figure S23.** STA measurements of pristine  $\text{CaAl}_2$  under a 50:50 flow of  $\text{Ar}:\text{O}_2$ . The black curve indicates the mass trace, blue the temperature change and red the heat flux.

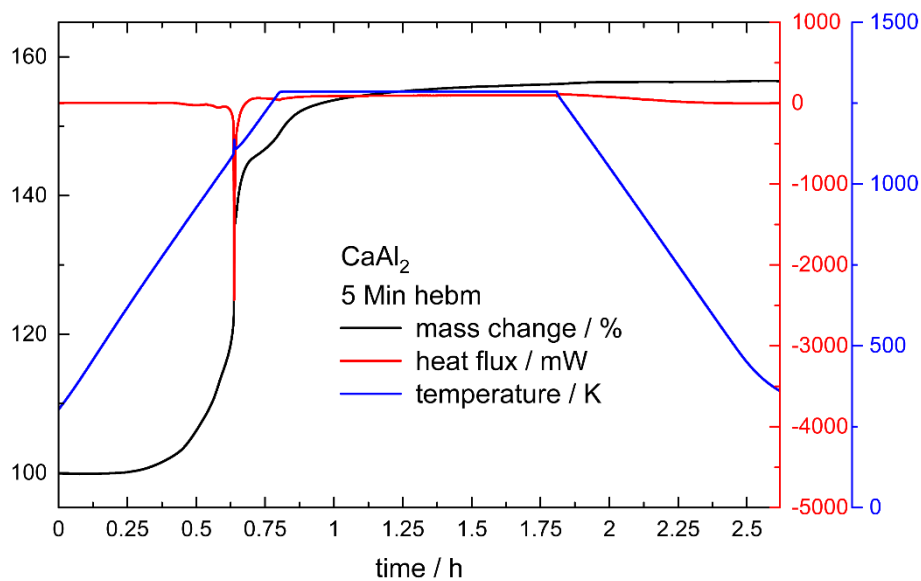

**Figure S24.** STA measurements of  $\text{CaAl}_2$  ball milled for 5 min under a 50:50 flow of  $\text{Ar}:\text{O}_2$ . The black curve indicates the mass trace, blue the temperature change and red the heat flux.



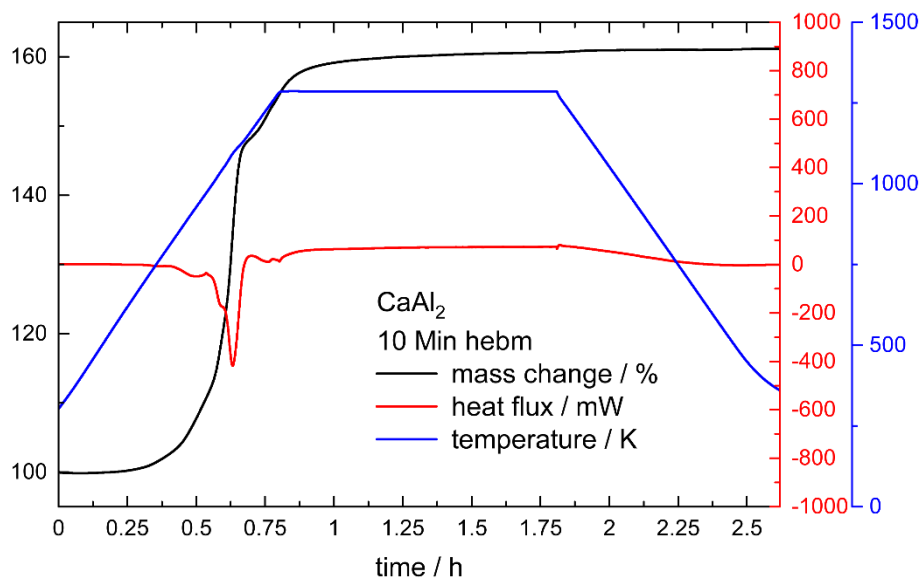

**Figure S25.** STA measurements of CaAl<sub>2</sub> ball milled for 10 min under a 50:50 flow of Ar:O<sub>2</sub>. The black curve indicates the mass trace, blue the temperature change and red the heat flux.

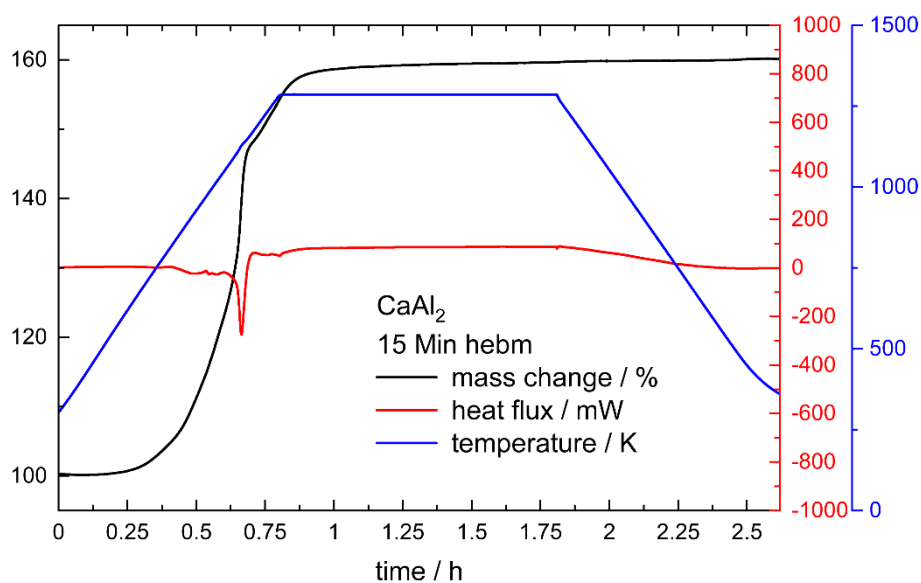

**Figure S26.** STA measurements of CaAl<sub>2</sub> ball milled for 15 min under a 50:50 flow of Ar:O<sub>2</sub>. The black curve indicates the mass trace, blue the temperature change and red the heat flux.

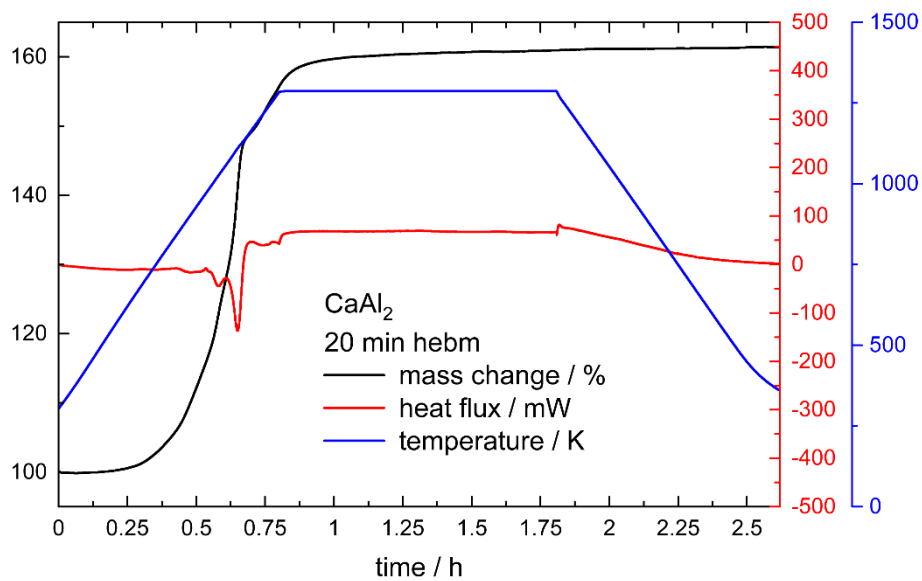

**Figure S27.** STA measurements of CaAl<sub>2</sub> ball milled for 20 min under a 50:50 flow of Ar:O<sub>2</sub>. The black curve indicates the mass trace, blue the temperature change and red the heat flux.

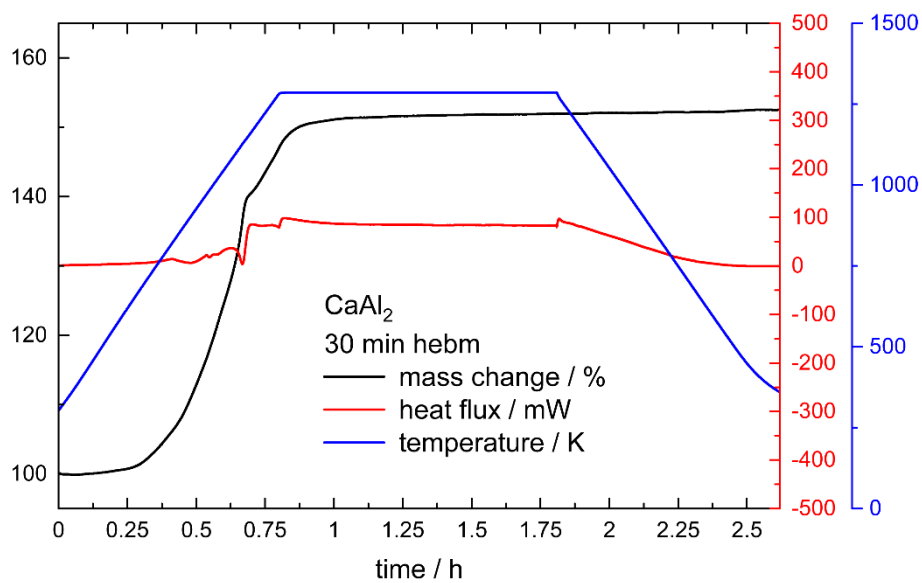

**Figure S28.** STA measurements of CaAl<sub>2</sub> ball milled for 30 min under a 50:50 flow of Ar:O<sub>2</sub>. The black curve indicates the mass trace, blue the temperature change and red the heat flux.

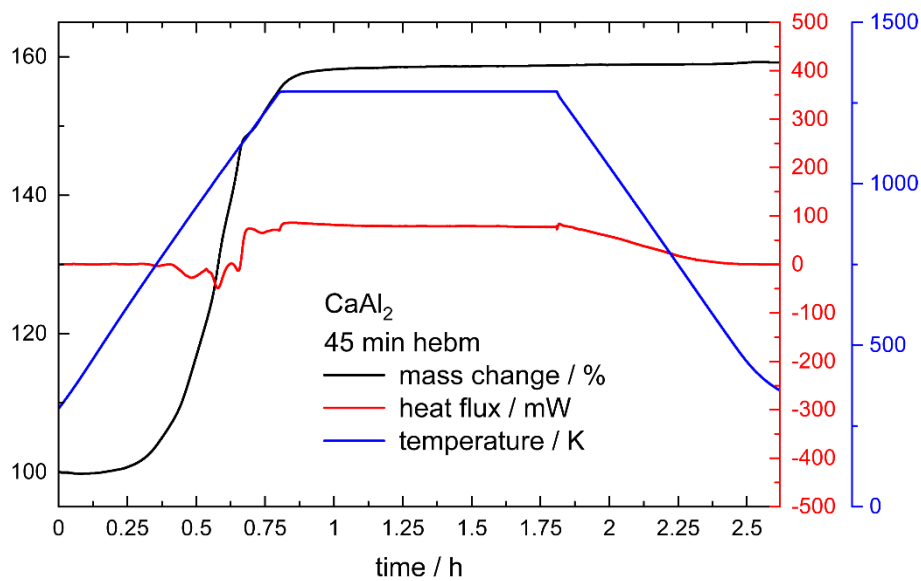

**Figure S29.** STA measurements of CaAl<sub>2</sub> ball milled for 45 min under a 50:50 flow of Ar:O<sub>2</sub>. The black curve indicates the mass trace, blue the temperature change and red the heat flux.

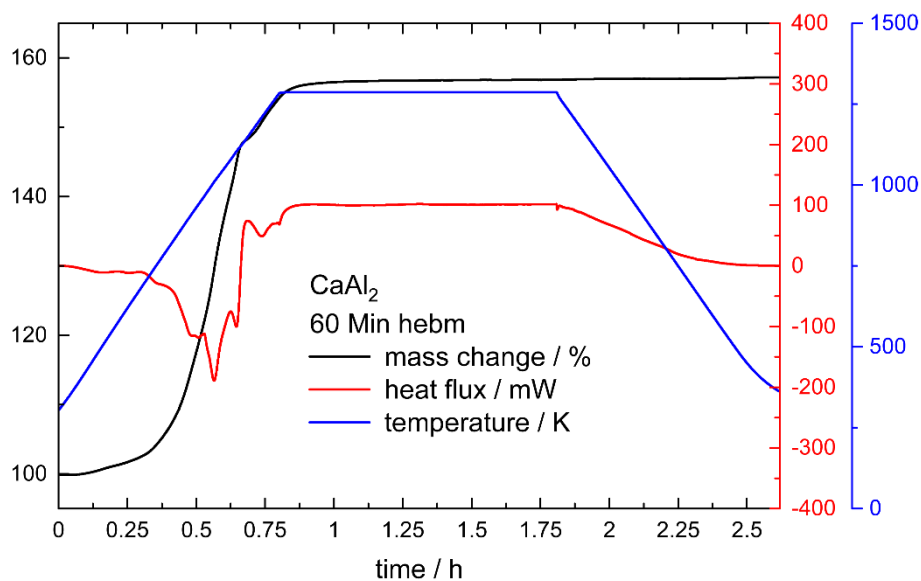

**Figure S30.** STA measurements of CaAl<sub>2</sub> ball milled for 60 min under a 50:50 flow of Ar:O<sub>2</sub>. The black curve indicates the mass trace, blue the temperature change and red the heat flux.

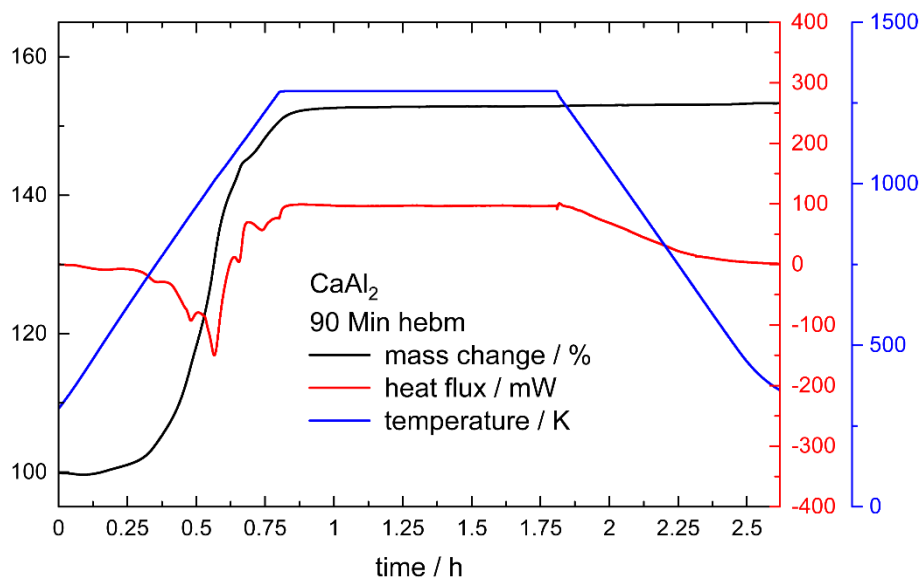

**Figure S31.** STA measurements of CaAl<sub>2</sub> ball milled for 90 min under a 50:50 flow of Ar:O<sub>2</sub>. The black curve indicates the mass trace, blue the temperature change and red the heat flux.

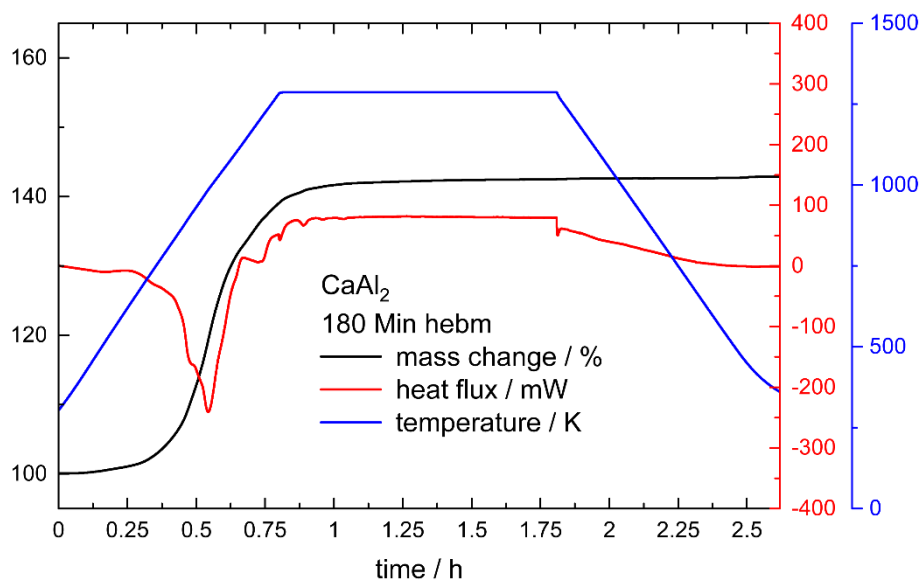

**Figure S32.** STA measurements of CaAl<sub>2</sub> ball milled for 180 min under a 50:50 flow of Ar:O<sub>2</sub>. The black curve indicates the mass trace, blue the temperature change and red the heat flux.

## $^{27}\text{Al}$ solid state MAS NMR

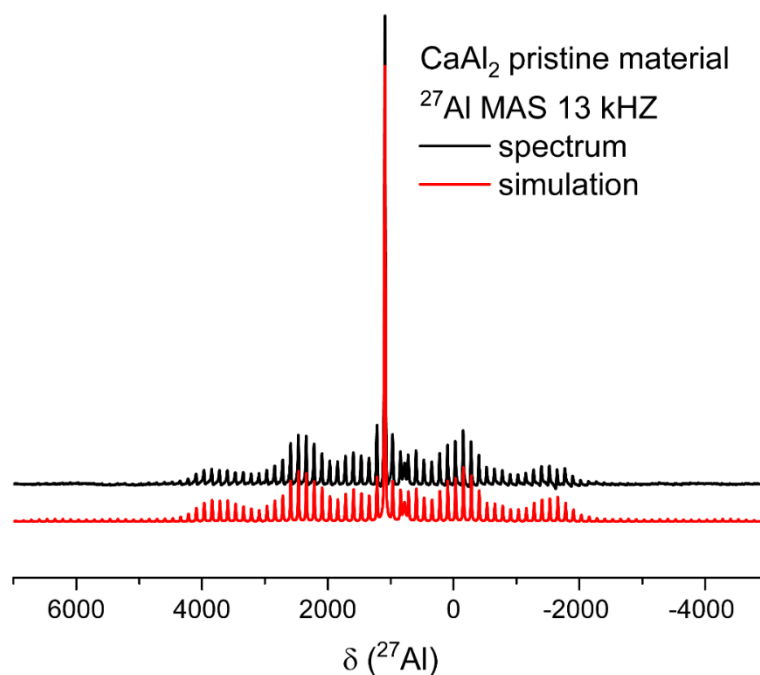

**Figure S33.**  $^{27}\text{Al}$  solid-state MAS NMR spectrum of pristine CaAl<sub>2</sub> recorded at a spinning frequency of 13 kHz. The black line shows the experimental data, the red line the simulation.

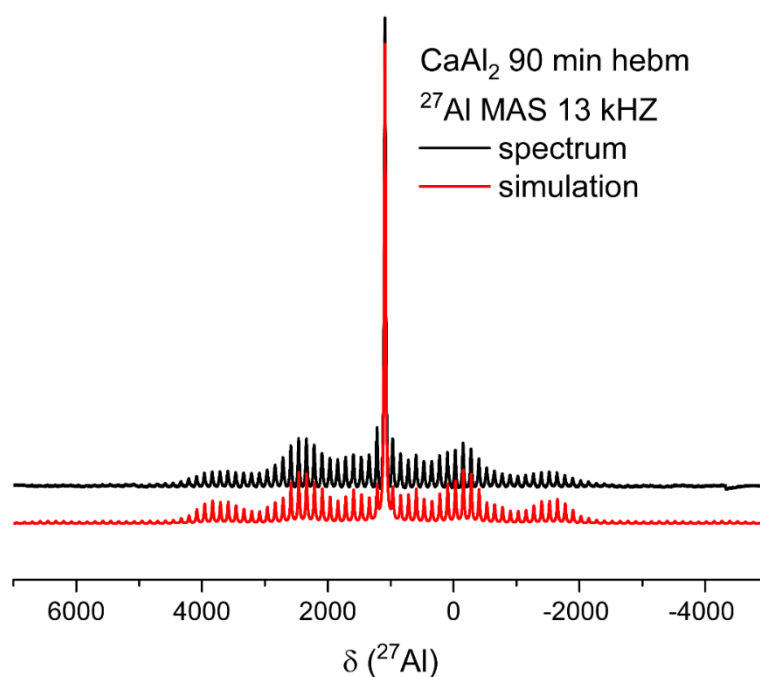

**Figure S34.**  $^{27}\text{Al}$  solid-state MAS NMR spectrum of CaAl<sub>2</sub> ball milled for 90 min recorded at a spinning frequency of 13 kHz. The black line shows the experimental data, the red line the simulation.

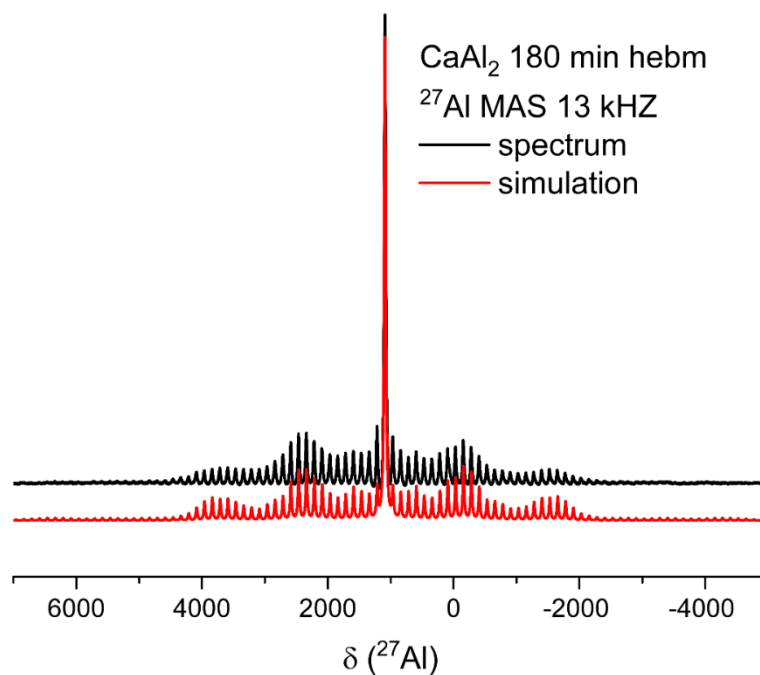

**Figure S35.** <sup>27</sup>Al solid-state MAS NMR spectrum of CaAl<sub>2</sub> ball milled for 180 min recorded at a spinning frequency of 13 kHz. The black line shows the experimental data, the red line the simulation.

## Product spectrum determined from PXRD

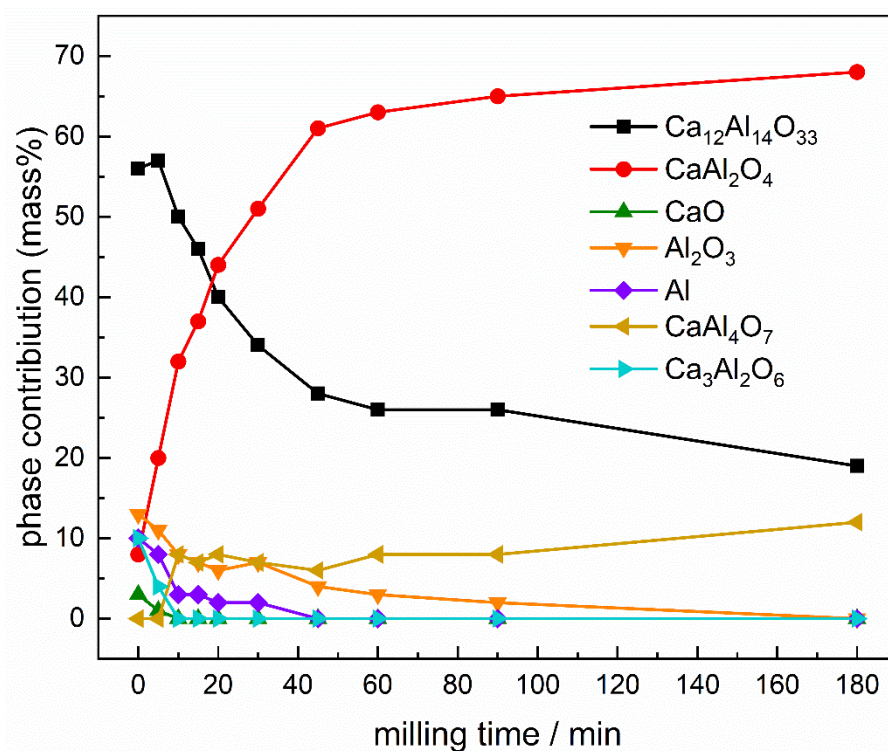

**Figure S36.** Phase contributions in mass-% for the oxidation reactions of ball milled  $\text{CaAl}_2$  plotted against the milling time.

## Powder X-ray diffraction with internal standard

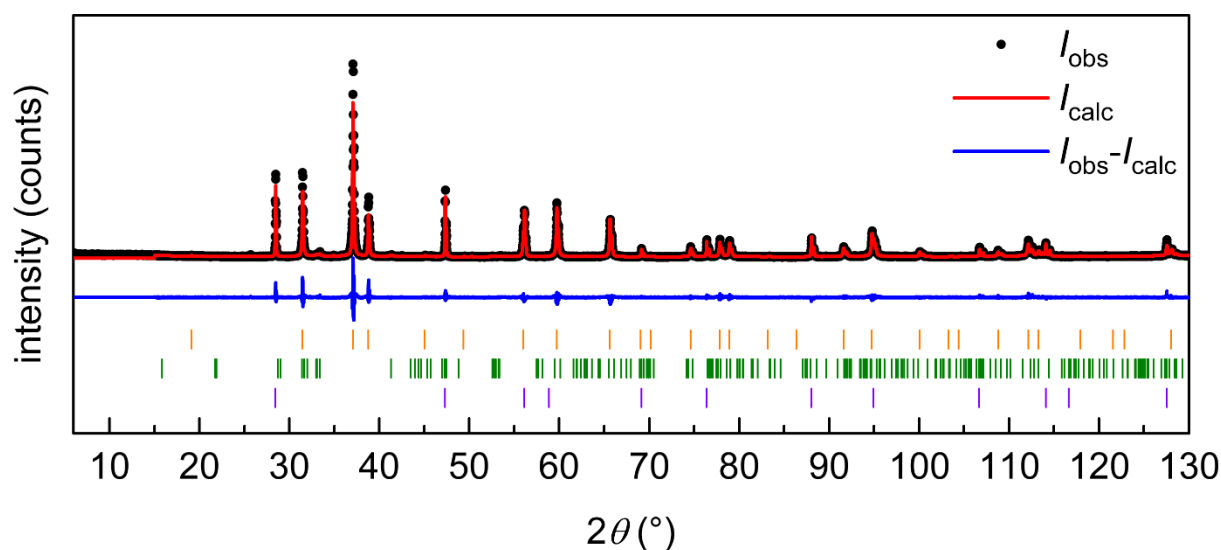

**Figure S37.** Powder X-ray diffraction pattern of CaAl<sub>2</sub> ball milled for 30 min, mixed with elemental Si as internal standard. Black circles represent the collected data, the red line is the fit, the blue line the difference curve and the ticks represent the Bragg positions of the refined phases. The following color code applies: orange – CaAl<sub>2</sub> (*Fd* $\bar{3}$ *m*); green – CaAl<sub>4</sub> (*C*2/*m*); purple – Si (*Fd* $\bar{3}$ *m*).

| Refinement details for the data shown in Figure S37 |                                                                                                                                              |
|-----------------------------------------------------|----------------------------------------------------------------------------------------------------------------------------------------------|
| Source                                              | Bruker D8 ADVANCE (laboratory X-ray)                                                                                                         |
| Temperature                                         | RT                                                                                                                                           |
| Pressure                                            | ambient                                                                                                                                      |
| Wavelengths                                         | Cu <i>K</i> α <sub>1</sub> and Cu <i>K</i> α <sub>2</sub> : 154.0596 and 154.4308 pm                                                         |
| <i>d</i> -space range                               | 0.85-14.35 Å (6-130° 2θ)                                                                                                                     |
| χ <sup>2</sup>                                      | 1.28                                                                                                                                         |
| <i>R</i> <sub>p</sub> / %                           | 8.32                                                                                                                                         |
| <i>R</i> <sub>wp</sub> / %                          | 10.55                                                                                                                                        |
| Definition of <i>R</i> factors                      | $R_p = \frac{\sum  w   I_0 - I_c ^2}{\sum  w  I_0^2};$ $R_{wp} = \left( \frac{\sum  w   I_0 - I_c ^2}{\sum  w  I_0^2} \right)^{\frac{1}{2}}$ |



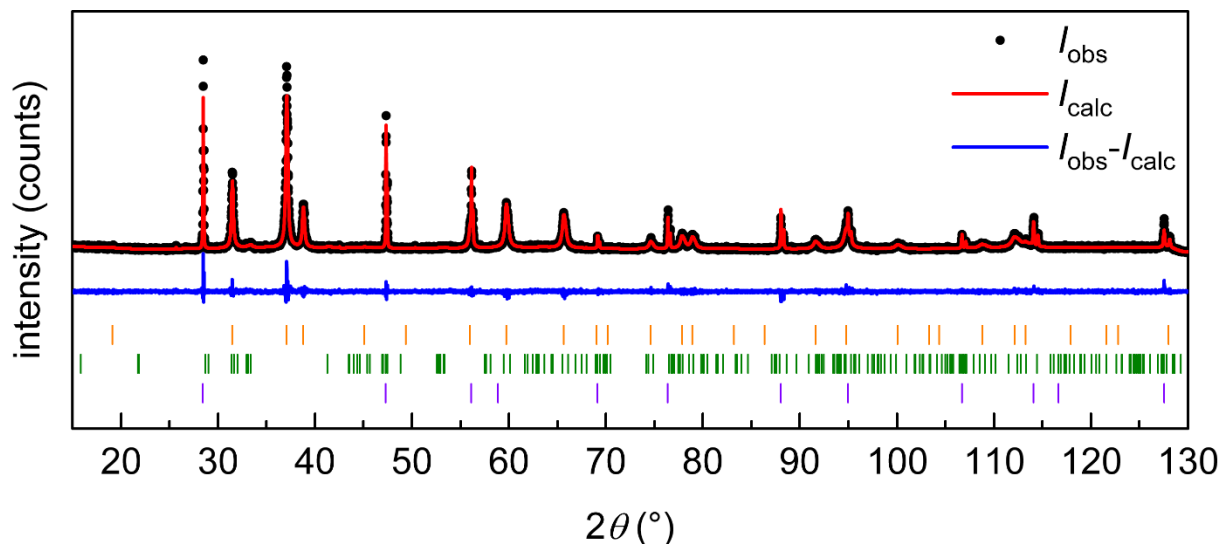

**Figure S38.** Powder X-ray diffraction pattern of  $\text{CaAl}_2$  ball milled for 180 min, mixed with elemental Si as internal standard. Black circles represent the collected data, the red line is the fit, the blue line the difference curve and the ticks represent the Bragg positions of the refined phases. The following color code applies: orange –  $\text{CaAl}_2$  ( $Fd\bar{3}m$ ); green –  $\text{CaAl}_4$  ( $C2/m$ ); purple – Si ( $Fd\bar{3}m$ ).

| Refinement details for the data shown in Figure S38 |                                                                                                                                             |
|-----------------------------------------------------|---------------------------------------------------------------------------------------------------------------------------------------------|
| Source                                              | Bruker D8 ADVANCE (laboratory X-ray)                                                                                                        |
| Temperature                                         | RT                                                                                                                                          |
| Pressure                                            | ambient                                                                                                                                     |
| Wavelengths                                         | Cu $K\alpha_1$ and Cu $K\alpha_2$ : 154.0596 and 154.4308 pm                                                                                |
| $d$ -space range                                    | 0.85-14.35 Å (6-130° $2\theta$ )                                                                                                            |
| $\chi^2$                                            | 3.43                                                                                                                                        |
| $R_p$ / %                                           | 9.41                                                                                                                                        |
| $R_{wp}$ / %                                        | 11.80                                                                                                                                       |
| Definition of $R$ factors                           | $R_p = \frac{\sum  w   I_0 - I_c ^2}{\sum  w  I_0^2}$ $R_{wp} = \left( \frac{\sum  w   I_0 - I_c ^2}{\sum  w  I_0^2} \right)^{\frac{1}{2}}$ |

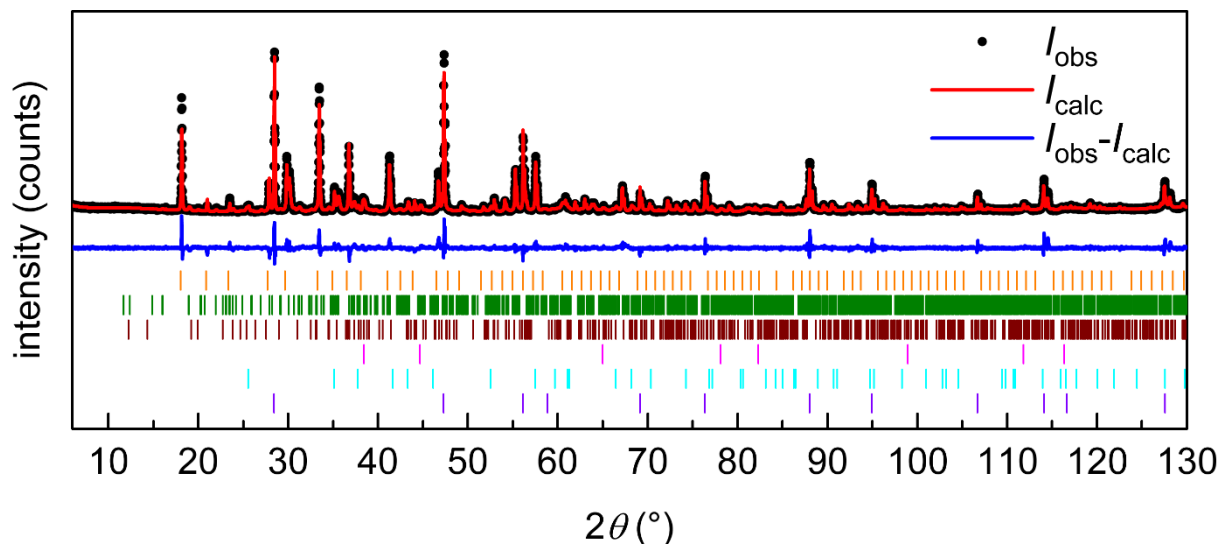

**Figure S39.** Powder X-ray diffraction pattern of CaAl<sub>2</sub> ball milled for 30 min and oxidized using pure O<sub>2</sub> in a tube furnace. Elemental Si was added as internal standard. Black circles represent the collected data, the red line is the fit, the blue line the difference curve and the ticks represent the Bragg positions of the refined phases. The following color code applies: orange – Ca<sub>12</sub>Al<sub>14</sub>O<sub>33</sub> ( $I\bar{4}3d$ ); green – CaAl<sub>2</sub>O<sub>4</sub> ( $P2_1/c$ ); dark red – CaAl<sub>4</sub>O<sub>7</sub> ( $C2/c$ ); pink – Al ( $Fm\bar{3}m$ ); cyan – Al<sub>2</sub>O<sub>3</sub> ( $R\bar{3}c$ ); purple – Si ( $Fd\bar{3}m$ ).

| Refinement details for the data shown in Figure S39 |                                                                                                                                             |
|-----------------------------------------------------|---------------------------------------------------------------------------------------------------------------------------------------------|
| Source                                              | Bruker D8 ADVANCE (laboratory X-ray)                                                                                                        |
| Temperature                                         | RT                                                                                                                                          |
| Pressure                                            | ambient                                                                                                                                     |
| Wavelengths                                         | Cu $K\alpha_1$ and Cu $K\alpha_2$ : 154.0596 and 154.4308 pm                                                                                |
| $d$ -space range                                    | 0.85-14.35 Å (6-130° 2 $\theta$ )                                                                                                           |
| $\chi^2$                                            | 4.01                                                                                                                                        |
| $R_p$ / %                                           | 9.04                                                                                                                                        |
| $R_{wp}$ / %                                        | 11.96                                                                                                                                       |
| Definition of $R$ factors                           | $R_p = \frac{\sum  w   I_0 - I_c ^2}{\sum  w  I_0^2}$ $R_{wp} = \left( \frac{\sum  w   I_0 - I_c ^2}{\sum  w  I_0^2} \right)^{\frac{1}{2}}$ |

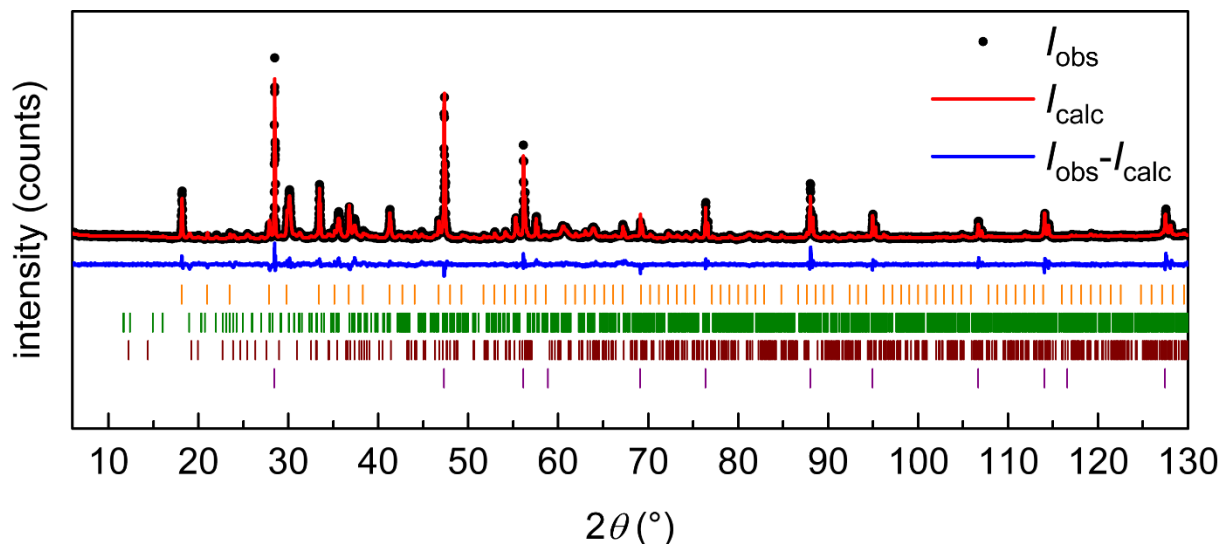

**Figure S40.** Powder X-ray diffraction pattern of CaAl<sub>2</sub> ball milled for 180 min and oxidized using pure O<sub>2</sub> in a tube furnace. Elemental Si was added as internal standard. Black circles represent the collected data, the red line is the fit, the blue line the difference curve and the ticks represent the Bragg positions of the refined phases. The following color code applies: orange – Ca<sub>12</sub>Al<sub>14</sub>O<sub>33</sub> ( $I\bar{4}3d$ ); green – CaAl<sub>2</sub>O<sub>4</sub> ( $P2_1/c$ ); dark red – CaAl<sub>4</sub>O<sub>7</sub> ( $C2/c$ ); purple – Si ( $Fd\bar{3}m$ ).

| <b>Refinement details for the data shown in Figure S40</b> |                                                                                                                                              |
|------------------------------------------------------------|----------------------------------------------------------------------------------------------------------------------------------------------|
| Source                                                     | Bruker D8 ADVANCE (laboratory X-ray)                                                                                                         |
| Temperature                                                | RT                                                                                                                                           |
| Pressure                                                   | ambient                                                                                                                                      |
| Wavelengths                                                | Cu $K\alpha_1$ and Cu $K\alpha_2$ : 154.0596 and 154.4308 pm                                                                                 |
| $d$ -space range                                           | 0.85-14.35 Å (6-130° $2\theta$ )                                                                                                             |
| $\chi^2$                                                   | 3.12                                                                                                                                         |
| $R_p$ / %                                                  | 8.02                                                                                                                                         |
| $R_{wp}$ / %                                               | 10.57                                                                                                                                        |
| Definition of $R$ factors                                  | $R_p = \frac{\sum  w   I_0 - I_c ^2}{\sum  w  I_0^2};$ $R_{wp} = \left( \frac{\sum  w   I_0 - I_c ^2}{\sum  w  I_0^2} \right)^{\frac{1}{2}}$ |

## **Crystallite sizes of the STA oxidized samples**

**Table S1.** Crystallite size (LVol-IB) of the via STA oxidized and previously milled  $\text{CaAl}_2$  samples at different milling times.

| Milling time / min | $\text{CaAl}_2\text{O}_4$<br>crystallite size / nm | $\text{Ca}_{12}\text{Al}_{14}\text{O}_{33}$<br>crystallite size / nm | Fig. |
|--------------------|----------------------------------------------------|----------------------------------------------------------------------|------|
| 5                  | 36(3)                                              | 84(2)                                                                | S14  |
| 10                 | 37(2)                                              | 121(2)                                                               | S15  |
| 15                 | 38(2)                                              | 119(3)                                                               | S16  |
| 20                 | 37(1)                                              | 116(3)                                                               | S17  |
| 30                 | 44(2)                                              | 99(5)                                                                | S18  |
| 45                 | 37(1)                                              | 79(2)                                                                | S19  |
| 60                 | 29(1)                                              | 47(1)                                                                | S20  |
| 90                 | 30(1)                                              | 56(2)                                                                | S21  |
| 180                | 31(1)                                              | 84(7)                                                                | S22  |
